# Supplementary material for: Involvement of Mitochondria in the Selective Response to Microsecond Pulsed Electric Fields on Healthy and Cancer Stem Cells in the Brain
Source: MDPI journal article supplement (doi:10.3390/ijms25042233), 2024-02-13
Supplement: s1 [file s1]

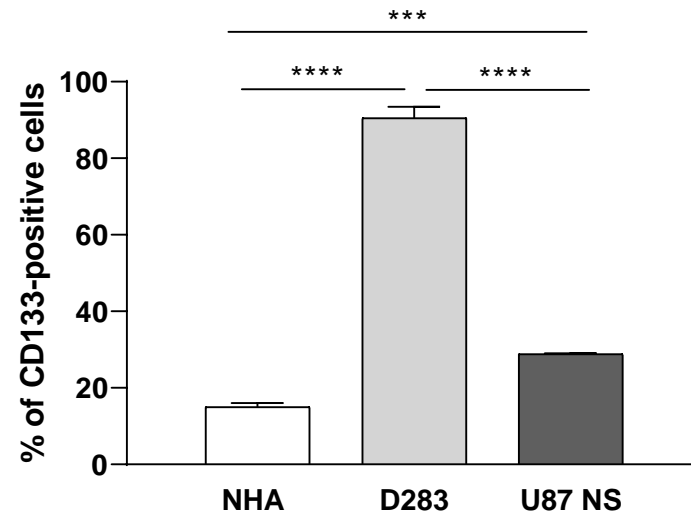

**Supplementary Figure S1.** Cytofluorimetric quantification of CD133-positive cells in NHA, D283 cells and in U87 NS.
