# Supplementary material for: Involvement of Mitochondria in the Selective Response to Microsecond Pulsed Electric Fields on Healthy and Cancer Stem Cells in the Brain
Source: MDPI journal article supplement (doi:10.3390/ijms25042233), 2024-02-13
Supplement: s1 [file s1]

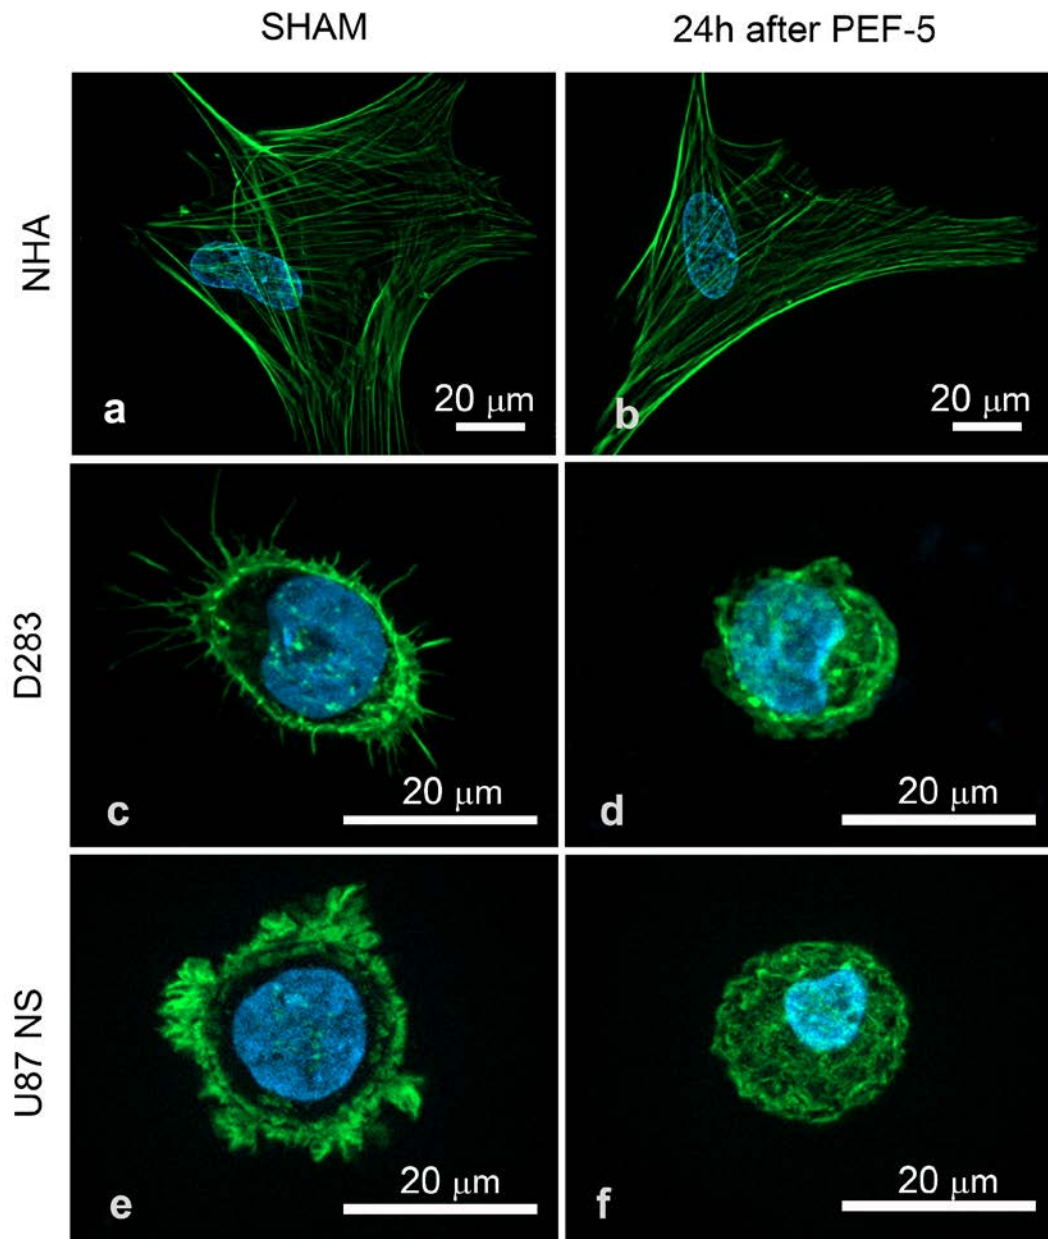

**Supplementary Figure S2.** Cytoskeleton analysis 24h after PEF-5 exposure. Fluorescent F-actin staining by Alexa Fluor 488 phalloidin highlights cytoskeleton distribution in SHAM- or PEF-5-exposed (a-b) NHA, (c-d) D283 and (e-f) U87 NS respectively.
