# Supplementary material for: Involvement of Mitochondria in the Selective Response to Microsecond Pulsed Electric Fields on Healthy and Cancer Stem Cells in the Brain
Source: MDPI journal article supplement (doi:10.3390/ijms25042233), 2024-02-13
Supplement: s1 [file s1]

**Supplementary Table S1.** List of single-gene fold changes with p value obtained from a whole transcriptome analysis conducted using Clariom S Affymetrix chips in NHA, D283 cells and U87 NS, 24h after PEF-5 exposure.

| NHA               |                |                  |           |
|-------------------|----------------|------------------|-----------|
| Affymetrix_ID     | GeneSymbol     | logFC (PEF/Sham) | adj.P.Val |
| TC1200006896.hg.1 | GPRC5A; MIR614 | 1.368285         | 0.093301  |
| TC2000008318.hg.1 | FERMT1         | 1.085343         | 0.093301  |
| TC0700011658.hg.1 | SEMA3E         | 0.9285575        | 0.093301  |
| TC0X00007190.hg.1 | PORCN          | 0.87634          | 0.093301  |
| TC0100011406.hg.1 | CD55           | 0.73662          | 0.093301  |
| TC1200009101.hg.1 | TMEM233        | 0.7133175        | 0.093301  |
| TC0900009569.hg.1 | NFIB           | -0.6215175       | 0.093301  |
| TC0100016199.hg.1 | OLFML2B        | -1.1368425       | 0.093301  |

## D283

| Affymetrix_ID         | GeneSymbol      | logFC (PEF/Sham) | adj.P.Val |
|-----------------------|-----------------|------------------|-----------|
| TC0900007576.hg.1     | ANXA1           | 5.096802         | 0.000808  |
| TC2200007204.hg.1     | HMOX1           | 3.08969          | 0.008043  |
| TC0X00007919.hg.1     | SRPX2           | 2.479953         | 0.002284  |
| TC1700008263.hg.1     | ABCC3           | 2.32651          | 0.000808  |
| TC1200006909.hg.1     | EMP1            | 2.165888         | 0.009372  |
| TC0500012519.hg.1     | SPARC           | 2.004983         | 0.016237  |
| TC1600010732.hg.1     | NQO1            | 2.000457         | 0.001628  |
| TC0300012243.hg.1     | SLC12A8         | 1.979453         | 0.019885  |
| TC1300009348.hg.1     | SPRY2           | 1.978242         | 0.000808  |
| TC0500012312.hg.1     | SPRY4           | 1.947323         | 0.011771  |
| TC1400009214.hg.1     | BMP4            | 1.875035         | 0.001731  |
| TC1700008228.hg.1     | ITGA3           | 1.79297          | 0.040728  |
| TC0100013581.hg.1     | SPOCD1          | 1.7608275        | 0.000808  |
| TC1200007804.hg.1     | METTL7B         | 1.726843         | 0.009372  |
| TC1000008891.hg.1     | DUSP5           | 1.706438         | 0.004876  |
| TC0200015958.hg.1     | DNER            | 1.705145         | 0.008995  |
| TC0300014082.hg.1     | ETV5            | 1.674613         | 0.002028  |
| Unmapped00000571.hg.1 | GREM1           | 1.668335         | 0.017866  |
| TC0400008007.hg.1     | GPAT3           | 1.639177         | 0.014734  |
| TC0300009855.hg.1     | IL1RAP          | 1.629743         | 0.002032  |
| TC0900011305.hg.1     | TNC             | 1.599238         | 0.019857  |
| TC1200011470.hg.1     | DUSP6           | 1.578512         | 0.000808  |
| TC1100009330.hg.1     | UBASH3B         | 1.54566          | 0.015832  |
| TC0100009364.hg.1     | CSF1            | 1.542675         | 0.005559  |
| TC0300009916.hg.1     | HES1            | 1.532572         | 0.000808  |
| TC1600006652.hg.1     | TNFRSF12A       | 1.519975         | 0.000808  |
| TC0X00011211.hg.1     | G6PD            | 1.50711          | 0.000808  |
| TC0300013513.hg.1     | P3H2            | 1.49009          | 0.005816  |
| TC0700006913.hg.1     | GPNMB           | 1.484563         | 0.023634  |
| Unmapped00000594.hg.1 | GREM1           | 1.482605         | 0.017853  |
| TC1800009290.hg.1     | MYO5B           | 1.460568         | 0.029311  |
| TC0800010002.hg.1     | DUSP4           | 1.402105         | 0.009372  |
| TC1100011110.hg.1     | CHRM1           | 1.367577         | 0.001451  |
| TC0100015925.hg.1     | KCNN3           | 1.3520775        | 0.051357  |
| TC0800009961.hg.1     | CLU; MIR6843    | 1.32036          | 0.001682  |
| TC1500007346.hg.1     | CGNL1           | 1.318723         | 0.067761  |
| TC0200015951.hg.1     | PID1            | 1.312488         | 0.002284  |
| TC0200012656.hg.1     | EFEMP1          | 1.300445         | 0.039823  |
| TC2200009234.hg.1     | 5PECC1L-ADORA2A | 1.26284          | 0.003664  |
| TC0300008467.hg.1     | ARHGAP31        | 1.256165         | 0.017943  |
| TC1700009731.hg.1     | GAS7            | 1.2507           | 0.039823  |
| TC0100018355.hg.1     | RHOU            | 1.226305         | 0.006372  |
| TC1400009529.hg.1     | ACTN1; HMGN1P3  | 1.207155         | 0.008006  |
| TC0200008900.hg.1     | TMEM87B         | 1.19422          | 0.001451  |
| TC1000008054.hg.1     | PLAU            | 1.176215         | 0.008392  |
| TC1600009349.hg.1     | GRIN2A          | 1.174157         | 0.034346  |
| TC0100016631.hg.1     | RGS16           | 1.17329          | 0.056365  |
| TC0100015867.hg.1     | S100A3          | 1.152035         | 0.008043  |

|                   |                |           |          |
|-------------------|----------------|-----------|----------|
| TC1700010790.hg.1 | ETV4           | 1.150027  | 0.006068 |
| TC1500006788.hg.1 | GREM1          | 1.139938  | 0.009488 |
| TC1400009329.hg.1 | RTN1           | 1.124238  | 0.031761 |
| TC0300010930.hg.1 | SLC6A20        | 1.108898  | 0.009372 |
| TC0100012921.hg.1 | DHRS3; MIR6730 | 1.108495  | 0.012849 |
| TC0100016350.hg.1 | CCDC181        | 1.091675  | 0.003487 |
| TC1900008057.hg.1 | ZFP36          | 1.074825  | 0.005559 |
| TC0600014265.hg.1 | CLIC1          | 1.07044   | 0.002032 |
| TC1000007890.hg.1 | HKDC1          | 1.069615  | 0.004849 |
| TC0500008785.hg.1 | EGR1           | 1.06633   | 0.034393 |
| TC0100011463.hg.1 | SYT14          | 1.055965  | 0.015386 |
| TC0700011809.hg.1 | TFPI2          | 1.053597  | 0.029311 |
| TC2000009458.hg.1 | NFATC2         | 1.046617  | 0.011967 |
| TC0X00009386.hg.1 | SRPX           | 1.045275  | 0.072053 |
| TC0500011502.hg.1 | ELL2           | 1.039438  | 0.022581 |
| TC0400011920.hg.1 | SLC7A11        | 1.038572  | 0.022541 |
| TC0100013872.hg.1 | EDN2           | 1.032205  | 0.042782 |
| TC1200011838.hg.1 | CMKLR1         | 1.031098  | 0.001451 |
| TC1000007895.hg.1 | TSPAN15        | 1.023375  | 0.003778 |
| TC0100012008.hg.1 | KCNK1          | 1.0168625 | 0.069123 |
| TC0300007645.hg.1 | PTPRG          | 1.01362   | 0.08515  |
| TC0200014414.hg.1 | CXCR4          | 1.010835  | 0.042782 |
| TC0200010216.hg.1 | ITGAV          | 1.00382   | 0.031042 |
| TC0100007449.hg.1 | SH3BGRL3       | 1.0020925 | 0.005864 |
| TC0100012006.hg.1 | KCNK1          | 1.001475  | 0.002731 |
| TC0100010152.hg.1 | LMNA           | 0.99782   | 0.009372 |
| TC1700009528.hg.1 | CXCL16         | 0.98979   | 0.00672  |
| TC0600011386.hg.1 | IER3           | 0.9840625 | 0.002555 |
| TC0100007512.hg.1 | GPR3           | 0.9806875 | 0.063352 |
| TC1000007891.hg.1 | HK1            | 0.949875  | 0.042782 |
| TC0200010745.hg.1 | IGFBP2         | 0.9437475 | 0.047411 |
| TC0600012434.hg.1 | ME1            | 0.9383075 | 0.010408 |
| TC1100012130.hg.1 | MMP10          | 0.9314475 | 0.009752 |
| TC0100009572.hg.1 | FAM46C         | 0.930155  | 0.031891 |
| TC0100018356.hg.1 | RHOU           | 0.928805  | 0.020367 |
| TC1100012131.hg.1 | MMP1           | 0.9268725 | 0.048814 |
| TC1800006650.hg.1 | RAB31          | 0.9249975 | 0.034655 |
| TC1200007992.hg.1 | SRGAP1         | 0.9144775 | 0.028639 |
| TC0200007803.hg.1 | LGALS1         | 0.9118325 | 0.016212 |
| TC0300009353.hg.1 | PPM1L          | 0.8798675 | 0.006916 |
| TC0500012599.hg.1 | ADAM19         | 0.879225  | 0.002032 |
| TC1200010655.hg.1 | LIMA1          | 0.8762625 | 0.013435 |
| TC1400009766.hg.1 | IRF2BPL        | 0.8711525 | 0.020484 |
| TC0900011120.hg.1 | KLF4           | 0.86275   | 0.018497 |
| TC0600008109.hg.1 | VEGFA          | 0.8573475 | 0.008043 |
| TC0100018246.hg.1 | LRRC8C         | 0.8533725 | 0.009083 |
| TC2200007150.hg.1 | TIMP3          | 0.85093   | 0.002555 |
| TC0600007552.hg.1 | DDR1; MIR4640  | 0.85047   | 0.005476 |
| TC0300013877.hg.1 | EPHB1          | 0.84744   | 0.056379 |
| TC1400007755.hg.1 | SAMD15         | 0.84706   | 0.009083 |

|                   |               |           |          |
|-------------------|---------------|-----------|----------|
| TC0500012238.hg.1 | HBEGF         | 0.8424975 | 0.009083 |
| TC0800011683.hg.1 | FBXO32        | 0.83826   | 0.040454 |
| TC0600007257.hg.1 | TRIM38        | 0.836025  | 0.039823 |
| TC0100015288.hg.1 | KCND3         | 0.82999   | 0.029311 |
| TC0100016112.hg.1 | TAGLN2        | 0.8297875 | 0.022519 |
| TC1800008952.hg.1 | DSEL          | 0.82944   | 0.029311 |
| TC0X00011404.hg.1 | IDS           | 0.825775  | 0.029311 |
| TC1600007964.hg.1 | MT1B; MT1CP   | 0.8257625 | 0.060134 |
| TC1500006925.hg.1 | THBS1         | 0.82378   | 0.055969 |
| TC2200007439.hg.1 | MCHR1         | 0.8196225 | 0.026984 |
| TC0800012393.hg.1 | ADRA1A        | 0.815555  | 0.045988 |
| TC0100016035.hg.1 | ETV3          | 0.813525  | 0.013906 |
| TC1700007262.hg.1 | MAP2K3        | 0.81221   | 0.015734 |
| TC1800009245.hg.1 | SERPINB8      | 0.811325  | 0.026119 |
| TC0100017420.hg.1 | DUSP10        | 0.8106    | 0.005816 |
| TC1000008489.hg.1 | LGI1          | 0.799655  | 0.015924 |
| TC1300007491.hg.1 | KLF5          | 0.7985225 | 0.056409 |
| TC0100011770.hg.1 | EPHX1         | 0.7984325 | 0.020484 |
| TC1600007962.hg.1 | MT1A          | 0.797865  | 0.063634 |
| TC1500010350.hg.1 | NTRK3         | 0.792745  | 0.089615 |
| TC0900010907.hg.1 | HSD17B3       | 0.78805   | 0.070844 |
| TC2100008496.hg.1 | SLC5A3; MRPS6 | 0.78336   | 0.009372 |
| TC0700007034.hg.1 | CREB5         | 0.7809075 | 0.052377 |
| TC0800008243.hg.1 | PDP1          | 0.780705  | 0.008043 |
| TC1200010866.hg.1 | CD63          | 0.7789725 | 0.00672  |
| TC0500008568.hg.1 | SLC12A2       | 0.778095  | 0.054722 |
| TC0800008667.hg.1 | NOV           | 0.7685375 | 0.057653 |
| TC0900007807.hg.1 | DAPK1         | 0.7676325 | 0.017168 |
| TC0300010632.hg.1 | OSBPL10       | 0.76559   | 0.040117 |
| TC0400012820.hg.1 | FGF5          | 0.760355  | 0.043036 |
| TC1900011774.hg.1 | EMP3          | 0.75618   | 0.098498 |
| TC1600011399.hg.1 | MT1X          | 0.75496   | 0.032167 |
| TC0800011075.hg.1 | TMEM55A       | 0.7478275 | 0.054722 |
| TC0800007114.hg.1 | SCARA3        | 0.743085  | 0.010829 |
| TC1500010796.hg.1 | SYNM          | 0.741545  | 0.031042 |
| TC0200008894.hg.1 | MERTK         | 0.7412375 | 0.030834 |
| TC0500009264.hg.1 | ADRA1B        | 0.74022   | 0.013638 |
| TC1600007957.hg.1 | MT2A          | 0.7382425 | 0.026606 |
| TC1400008013.hg.1 | SLC24A4       | 0.7375375 | 0.095993 |
| TC0300007237.hg.1 | LIMD1         | 0.7365575 | 0.087317 |
| TC0300006483.hg.1 | BHLHE40       | 0.73412   | 0.039823 |
| TC0900009949.hg.1 | TPM2          | 0.732285  | 0.003778 |
| TC0200014361.hg.1 | LYPD1         | 0.73103   | 0.029311 |
| TC0200015128.hg.1 | PDE1A         | 0.7308225 | 0.03996  |
| TC1400007566.hg.1 | SMOC1         | 0.72706   | 0.005559 |
| TC0500009706.hg.1 | SQSTM1        | 0.726985  | 0.013855 |
| TC1600011440.hg.1 | OSGIN1        | 0.7257175 | 0.031058 |
| TC0500012826.hg.1 | SH3PXD2B      | 0.7253275 | 0.015902 |
| TC0100014966.hg.1 | GCLM          | 0.7206725 | 0.055244 |
| TC0500007201.hg.1 | OSMR          | 0.7149475 | 0.039823 |

|                       |                  |           |          |
|-----------------------|------------------|-----------|----------|
| TC0400010785.hg.1     | IGFBP7           | 0.709805  | 0.092749 |
| TC0200008230.hg.1     | TMSB10           | 0.7045    | 0.009752 |
| TC0200009060.hg.1     | STEAP3           | 0.7033825 | 0.034185 |
| TC1700007135.hg.1     | TRIM16L          | 0.7020675 | 0.032167 |
| TC1400008486.hg.1     | CRIP2            | 0.7004775 | 0.015386 |
| TC0900010462.hg.1     | RFK              | 0.6969375 | 0.005559 |
| TC1200008488.hg.1     | PLXNC1           | 0.6962525 | 0.019885 |
| TC0100018497.hg.1     | SHC1             | 0.6957625 | 0.008043 |
| TC1600007967.hg.1     | MT1IP            | 0.68971   | 0.064187 |
| TC1900006471.hg.1     | HCN2             | 0.6867475 | 0.048814 |
| TC1200009722.hg.1     | TNFRSF1A         | 0.6802625 | 0.040396 |
| TC1900007384.hg.1     | GDF15            | 0.6781    | 0.013982 |
| TC0X00007918.hg.1     | TNMD             | 0.6751175 | 0.081193 |
| TC1000008315.hg.1     | BMPRI1A          | 0.6737975 | 0.008237 |
| TC0200014620.hg.1     | CACNB4           | 0.67135   | 0.013435 |
| TC1100012949.hg.1     | IFITM1           | 0.666145  | 0.015832 |
| TC1100006879.hg.1     | PARVA            | 0.6635025 | 0.029536 |
| TC0500009544.hg.1     | MSX2             | 0.66324   | 0.047411 |
| TC1700012039.hg.1     | 0130370; RP11-10 | 0.6632025 | 0.022805 |
| TC1200011474.hg.1     | ATP2B1           | 0.6629675 | 0.089615 |
| TC1900008432.hg.1     | EHD2             | 0.6607525 | 0.034718 |
| TC1000006652.hg.1     | PFKFB3           | 0.6560825 | 0.076954 |
| TC0200007237.hg.1     | CRIM1            | 0.65408   | 0.083707 |
| TC1600010421.hg.1     | MT1G             | 0.653945  | 0.058214 |
| Unmapped00000622.hg.1 | GREM1            | 0.652085  | 0.020754 |
| TC0200016571.hg.1     | OSBPL6           | 0.650405  | 0.033907 |
| TC1000007132.hg.1     | BAMBI            | 0.649255  | 0.070844 |
| TC1700011060.hg.1     | FAM117A          | 0.6445975 | 0.020754 |
| TC0400012641.hg.1     | PDLIM3           | 0.64399   | 0.014123 |
| TC1100011052.hg.1     | FADS3            | 0.643235  | 0.036059 |
| TC1400007201.hg.1     | CDKN3            | 0.640865  | 0.014734 |
| TC2100007917.hg.1     | KRTAP11-1        | 0.639005  | 0.083707 |
| TC0500013059.hg.1     | CBY3             | 0.6386425 | 0.089337 |
| TC0600012542.hg.1     | UBE2J1           | 0.63611   | 0.013435 |
| TC1200012234.hg.1     | CLIP1            | 0.6341075 | 0.029311 |
| TC1400009524.hg.1     | ZFP36L1          | 0.6319475 | 0.020484 |
| TC1700009333.hg.1     | NXN              | 0.6284425 | 0.033907 |
| TC0600013186.hg.1     | CTGF             | 0.62806   | 0.093575 |
| TC0400009322.hg.1     | GALNT7           | 0.6280075 | 0.089615 |
| TC1500010369.hg.1     | MFGE8            | 0.6267775 | 0.063352 |
| TC1200007859.hg.1     | NAB2             | 0.6260275 | 0.015832 |
| TC0400012821.hg.1     | C4orf22          | 0.623755  | 0.047361 |
| TC1900009754.hg.1     | DNASE2           | 0.623495  | 0.008995 |
| TC1700011074.hg.1     | DLX3             | 0.6225375 | 0.016237 |
| TC1600007966.hg.1     | MT1H             | 0.6224825 | 0.063864 |
| TC0700010719.hg.1     | TBX20            | 0.6222575 | 0.007953 |
| TC2100007803.hg.1     | APP              | 0.6221525 | 0.014815 |
| TC1900010706.hg.1     | SERTAD1          | 0.6187925 | 0.048814 |
| TC1900008416.hg.1     | INAFM1           | 0.618225  | 0.019857 |
| TC0900011938.hg.1     | C9orf116         | 0.61488   | 0.053736 |

|                       |                              |           |          |
|-----------------------|------------------------------|-----------|----------|
| TC0800011634.hg.1     | SNTB1                        | 0.6128175 | 0.035301 |
| TC0300013684.hg.1     | TFRC                         | 0.6120275 | 0.010786 |
| TC0100009452.hg.1     | FAM19A3                      | 0.6113625 | 0.01441  |
| TC0600012040.hg.1     | TRAM2                        | 0.61054   | 0.079699 |
| TC1900009369.hg.1     | PLIN3                        | 0.60819   | 0.028639 |
| TC0900011379.hg.1     | MEGF9                        | 0.6075175 | 0.095007 |
| TC1700012310.hg.1     | MFSD11                       | 0.60698   | 0.039823 |
| TC1400009151.hg.1     | TRIM9                        | 0.60385   | 0.051499 |
| TC0800009529.hg.1     | PPP1R3B                      | 0.5950325 | 0.023634 |
| TC0600012554.hg.1     | BACH2                        | 0.5933475 | 0.042799 |
| TC0800011334.hg.1     | KLF10                        | 0.59026   | 0.019885 |
| TC0100011920.hg.1     | GALNT2                       | 0.588315  | 0.043968 |
| TC1400007665.hg.1     | BBOF1                        | 0.58761   | 0.021976 |
| TC0300011200.hg.1     | TKT                          | 0.5864425 | 0.021503 |
| Unmapped00000328.hg.1 | DGKD                         | 0.5857275 | 0.083707 |
| TC1100007884.hg.1     | SLC3A2                       | 0.5849475 | 0.028639 |
| TC1100012686.hg.1     | ESAM                         | 0.5826525 | 0.040117 |
| TC1900008507.hg.1     | FTL                          | 0.58121   | 0.040148 |
| TC1200010865.hg.1     | ITGA7                        | 0.58007   | 0.019885 |
| TC0600008146.hg.1     | RUNX2                        | 0.578985  | 0.01049  |
| TC0600010853.hg.1     | GFOD1                        | 0.578025  | 0.038333 |
| TC0500010635.hg.1     | HMGCS1                       | 0.5725125 | 0.09986  |
| TC1200012641.hg.1     | RDH5                         | 0.5724875 | 0.042782 |
| TC1200008675.hg.1     | TXNRD1                       | 0.572415  | 0.035368 |
| TC0300014090.hg.1     | ATP13A3                      | 0.5713275 | 0.021976 |
| TC1800008287.hg.1     | ANKRD29                      | 0.56696   | 0.061048 |
| TC1700006627.hg.1     | SPNS2                        | 0.56536   | 0.087532 |
| TC0300012238.hg.1     | HEG1                         | 0.56459   | 0.031307 |
| TC1600010603.hg.1     | RRAD                         | 0.5643    | 0.028639 |
| TC0300012233.hg.1     | ITGB5                        | 0.5641525 | 0.021679 |
| TC0900012157.hg.1     | AKAP2                        | 0.56053   | 0.039156 |
| TC2100007037.hg.1     | CBR3                         | 0.558625  | 0.036649 |
| TC1400010616.hg.1     | SLC38A6                      | 0.5498525 | 0.025274 |
| TC0100008017.hg.1     | RIMKLA                       | 0.5481725 | 0.080167 |
| TC0300010975.hg.1     | KIF9                         | 0.5474125 | 0.093525 |
| TC0500007258.hg.1     | GHR                          | 0.54726   | 0.063597 |
| TC1100009533.hg.1     | ADAMTS15                     | 0.546845  | 0.099937 |
| TC1700011774.hg.1     | TRIM47                       | 0.5429975 | 0.060052 |
| TC1000011606.hg.1     | BLOC1S2                      | 0.5411175 | 0.015386 |
| TC0700008306.hg.1     | FZD1                         | 0.54058   | 0.07088  |
| TC0100009908.hg.1     | ECM1                         | 0.5397825 | 0.022541 |
| TC1000010172.hg.1     | SVIL                         | 0.5386525 | 0.076511 |
| TC0100010887.hg.1     | C1orf21                      | 0.5366675 | 0.079459 |
| TC2100007140.hg.1     | ETS2                         | 0.535835  | 0.04219  |
| TC0100013713.hg.1     | STK40                        | 0.5351975 | 0.040148 |
| TC1900007127.hg.1     | IER2                         | 0.5334775 | 0.029311 |
| TC0100017575.hg.1     | WNT9A                        | 0.533355  | 0.05439  |
| TC0300009324.hg.1     | IQGAP1; SCHIP1; IQGAP-SCHIP1 | 0.5328575 | 0.029311 |
| TC0300011525.hg.1     | RYBP                         | 0.532135  | 0.093575 |
| TC1000010006.hg.1     | DNAJC1                       | 0.5261625 | 0.033907 |

|                       |               |           |          |
|-----------------------|---------------|-----------|----------|
| TC0300007257.hg.1     | CCR5          | 0.5257175 | 0.037257 |
| TC1500008757.hg.1     | ATP10A        | 0.523945  | 0.083402 |
| TC1100013097.hg.1     | REXO2         | 0.52005   | 0.090778 |
| TC1900011663.hg.1     | CCDC159       | 0.5194475 | 0.096851 |
| TC0X00010877.hg.1     | FAM122B       | 0.519055  | 0.020484 |
| TC2200009236.hg.1     | GGT1          | 0.51659   | 0.039397 |
| TC0100006773.hg.1     | SPSB1         | 0.51646   | 0.015622 |
| TC1400007710.hg.1     | JDP2          | 0.514905  | 0.019857 |
| TC1700007791.hg.1     | RARA          | 0.5148075 | 0.044279 |
| TC1700008216.hg.1     | KAT7          | 0.50975   | 0.05125  |
| TC0300008550.hg.1     | CSTA          | 0.50632   | 0.083707 |
| TC1000008056.hg.1     | VCL           | 0.50526   | 0.036649 |
| Unmapped00000639.hg.1 | SERTAD4       | 0.5031725 | 0.087852 |
| TC0300013360.hg.1     | ABCC5         | 0.5028875 | 0.052322 |
| TC1100006494.hg.1     | CD151         | 0.5020975 | 0.032167 |
| TC1800007276.hg.1     | CTIF; MIR4743 | 0.501635  | 0.045988 |
| TC0400010688.hg.1     | USP46         | 0.50094   | 0.049675 |
| TC1600007965.hg.1     | MT1F          | 0.5008575 | 0.063352 |
| TC1800008821.hg.1     | RAX           | 0.49594   | 0.042782 |
| TC0500013064.hg.1     | MGAT4B        | 0.4945525 | 0.063352 |
| TC1700012361.hg.1     | CDRT1         | 0.4921375 | 0.086088 |
| TC0100007370.hg.1     | RCAN3         | 0.4913225 | 0.056715 |
| TC0200013135.hg.1     | EVA1A         | 0.4895425 | 0.081553 |
| TC0800007185.hg.1     | RBPMS         | 0.4884475 | 0.073421 |
| TC0200010858.hg.1     | STK11IP       | 0.48659   | 0.054881 |
| TC0200016597.hg.1     | SPEG          | 0.4856775 | 0.091951 |
| TC1900006499.hg.1     | ARID3A        | 0.485395  | 0.013857 |
| TC0X00011382.hg.1     | ACSL4         | 0.4839225 | 0.089988 |
| TC1900011867.hg.1     | TMEM205       | 0.4804425 | 0.065308 |
| TC1700007677.hg.1     | DUSP14        | 0.47662   | 0.067922 |
| TC1100008469.hg.1     | SERPINH1      | 0.4759825 | 0.08467  |
| TC0300014093.hg.1     | PCYT1A        | 0.4748325 | 0.026099 |
| TC0800010034.hg.1     | GSR           | 0.474415  | 0.059872 |
| TC0X00007507.hg.1     | EFNB1         | 0.4742125 | 0.055098 |
| TC1400010195.hg.1     | WARS          | 0.473935  | 0.061412 |
| TC0100013028.hg.1     | EPHA2         | 0.470065  | 0.081684 |
| TC1200008683.hg.1     | CHST11        | 0.4699375 | 0.032144 |
| TC1200010493.hg.1     | DBX2          | 0.46939   | 0.034185 |
| TC0900008109.hg.1     | HABP4         | 0.4690475 | 0.029311 |
| TC0400006583.hg.1     | GRK4          | 0.466845  | 0.039397 |
| TC1900011958.hg.1     | ERF           | 0.46413   | 0.040117 |
| TC1700006660.hg.1     | KIF1C         | 0.4637875 | 0.037923 |
| TC0200011054.hg.1     | ARMC9         | 0.4613125 | 0.08286  |
| TC0900012162.hg.1     | ORM1          | 0.4589625 | 0.059063 |
| TC1100007577.hg.1     | TRIM48        | 0.4571225 | 0.069087 |
| TC1000012423.hg.1     | PFKP          | 0.453035  | 0.026119 |
| TC0800007367.hg.1     | ADAM9         | 0.45202   | 0.083707 |
| TC1300009538.hg.1     | OXGR1         | 0.44903   | 0.089615 |
| TC0100010104.hg.1     | ZBTB7B        | 0.44829   | 0.043968 |
| TC2200009233.hg.1     | ADORA2A       | 0.4470025 | 0.052426 |

|                       |             |           |          |
|-----------------------|-------------|-----------|----------|
| TC1000006802.hg.1     | CAMK1D      | 0.4455475 | 0.083408 |
| TC1100009335.hg.1     | C11orf63    | 0.4452775 | 0.095599 |
| TC1000007990.hg.1     | DDIT4       | 0.44519   | 0.084384 |
| TC0600011376.hg.1     | PPP1R18     | 0.444865  | 0.072647 |
| TC0X00008198.hg.1     | PLS3        | 0.4442525 | 0.041902 |
| TC0700008563.hg.1     | EPO         | 0.44271   | 0.049675 |
| TC0X00010356.hg.1     | BTK         | 0.4420925 | 0.072053 |
| TC0400012621.hg.1     | ACSL1       | 0.4416425 | 0.089988 |
| TC1600007960.hg.1     | MT1M        | 0.44157   | 0.085213 |
| TC1100011295.hg.1     | CCDC87      | 0.4415375 | 0.032939 |
| TC1700012370.hg.1     | TBC1D28     | 0.440995  | 0.068578 |
| TC1100011652.hg.1     | GDPD5       | 0.438865  | 0.063864 |
| TC1100009521.hg.1     | APLP2       | 0.4383925 | 0.062066 |
| TC0200006779.hg.1     | FAM84A      | 0.437425  | 0.050232 |
| TC0800008783.hg.1     | SQLE        | 0.4365325 | 0.048814 |
| TC2000006559.hg.1     | CDC25B      | 0.4338375 | 0.069087 |
| TC0900010971.hg.1     | TBC1D2      | 0.43239   | 0.087317 |
| TC0300007220.hg.1     | ZNF502      | 0.4322275 | 0.096313 |
| TC0800012290.hg.1     | UBXN8       | 0.4317825 | 0.097452 |
| TC0200013298.hg.1     | ST3GAL5     | 0.431575  | 0.099173 |
| TC0X00008833.hg.1     | FAM50A      | 0.43152   | 0.054722 |
| TC2100007508.hg.1     | KCNE1       | 0.430735  | 0.083707 |
| Unmapped00000145.hg.1 | SAG         | 0.4290025 | 0.091951 |
| TC0100018463.hg.1     | RHOC        | 0.42836   | 0.038773 |
| TC0700006629.hg.1     | FSCN1       | 0.4280175 | 0.091951 |
| TC2200006501.hg.1     | IL17RA      | 0.427245  | 0.084479 |
| TC1200008924.hg.1     | DTX1        | 0.4251675 | 0.069123 |
| TC2200008966.hg.1     | KIAA0930    | 0.42494   | 0.084891 |
| TC2100008417.hg.1     | COL18A1-AS1 | 0.424675  | 0.061141 |
| TC1200012597.hg.1     | MGST1       | 0.4229825 | 0.042564 |
| TC1500006896.hg.1     | SPRED1      | 0.42189   | 0.055828 |
| TC1400010033.hg.1     | ASB2        | 0.4190025 | 0.067659 |
| TC1100013192.hg.1     | CLCF1       | 0.411835  | 0.07981  |
| TC1800006506.hg.1     | MYL12A      | 0.4118075 | 0.075624 |
| TC0500012938.hg.1     | CLTB        | 0.41161   | 0.037257 |
| TC1900011331.hg.1     | ZNF665      | 0.40821   | 0.073421 |
| TC2200007246.hg.1     | MYH9        | 0.40808   | 0.043948 |
| TC0900011404.hg.1     | STOM        | 0.4075    | 0.065308 |
| TC0200011062.hg.1     | B3GNT7      | 0.40729   | 0.089722 |
| TC1100011451.hg.1     | FGF4        | 0.406285  | 0.039397 |
| TC0600011065.hg.1     | KIAA0319    | 0.4056    | 0.09271  |
| TC1200011310.hg.1     | PHLDA1      | 0.4050425 | 0.058214 |
| TC0200011130.hg.1     | DGKD        | 0.404785  | 0.062916 |
| TC0600011809.hg.1     | CCND3       | 0.40398   | 0.08302  |
| TC0600007477.hg.1     | MOG         | 0.40262   | 0.081193 |
| TC0500009346.hg.1     | WWC1        | 0.40221   | 0.088133 |
| TC1200010158.hg.1     | KRAS        | 0.4004875 | 0.09271  |
| TC0100011721.hg.1     | CAPN2       | 0.4002425 | 0.056379 |
| TC1000012582.hg.1     | RRP12       | 0.399745  | 0.099979 |
| TC0100010577.hg.1     | MROH9       | 0.39919   | 0.054722 |



|                      |               |           |          |
|----------------------|---------------|-----------|----------|
| Unmapped00000098.hg  | DGKD          | 0.3974525 | 0.061889 |
| TC1200010653.hg.1    | CERS5         | 0.39564   | 0.049941 |
| TC0100017212.hg.1    | SLC30A1       | 0.392975  | 0.070844 |
| TC0400008616.hg.1    | BBS12         | 0.38977   | 0.090101 |
| TC1700009385.hg.1    | SLC43A2       | 0.3897275 | 0.063352 |
| TC0600014215.hg.1    | GMDS          | 0.385335  | 0.095007 |
| TC1900008184.hg.1    | CIC           | 0.385205  | 0.067922 |
| TC0700006915.hg.1    | MALSU1        | 0.3839975 | 0.087852 |
| TC0800007245.hg.1    | MAK16         | 0.3837225 | 0.045988 |
| TC0300006687.hg.1    | CCDC174       | 0.3833175 | 0.054722 |
| TC0300008964.hg.1    | MRPS22        | 0.3758225 | 0.081553 |
| TC0100016296.hg.1    | GPA33         | 0.3753975 | 0.047411 |
| TC1200012153.hg.1    | PXN           | 0.37468   | 0.095007 |
| TC0700013341.hg.1    | CHN2          | 0.370945  | 0.089615 |
| TC0600012871.hg.1    | TRAF3IP2      | 0.36989   | 0.083707 |
| TC1600008141.hg.1    | CBFB          | 0.368255  | 0.05933  |
| TC1600006641.hg.1    | FLYWCH2       | 0.3676425 | 0.063528 |
| TC0200016570.hg.1    | HOXD3         | 0.36505   | 0.063352 |
| TC1900006588.hg.1    | GADD45B       | 0.365     | 0.079699 |
| TC1200010145.hg.1    | BCAT1         | 0.36338   | 0.072053 |
| TC1700008945.hg.1    | SPHK1         | 0.3625075 | 0.079699 |
| TC0900007064.hg.1    | DNAJB5        | 0.362205  | 0.09375  |
| TC0200008617.hg.1    | PDCL3         | 0.361595  | 0.070844 |
| TC1100010051.hg.1    | TMEM9B        | 0.3612575 | 0.073139 |
| TC2200008467.hg.1    | PLA2G3        | 0.3595275 | 0.069087 |
| TC0900008869.hg.1    | ODF2          | 0.3594225 | 0.057268 |
| TC0900011177.hg.1    | TXN           | 0.3542575 | 0.061048 |
| TC0800010275.hg.1    | PLAT          | 0.3542225 | 0.08515  |
| TC1100011058.hg.1    | FTH1          | 0.3540125 | 0.057585 |
| TC0300013934.hg.1    | EMC3          | 0.35272   | 0.087258 |
| Unmapped00000001.hg  | ZKSCAN7       | 0.351625  | 0.071512 |
| TC1300008108.hg.1    | F7            | 0.350515  | 0.077921 |
| TC1800006757.hg.1    | LDLRAD4       | 0.350515  | 0.089988 |
| TC0300013874.hg.1    | SRPRB         | 0.349685  | 0.079699 |
| TC0X00010880.hg.1    | MOSPD1        | 0.34955   | 0.081684 |
| TC0500010835.hg.1    | PLK2          | 0.3455325 | 0.065979 |
| TC0100015196.hg.1    | PSMA5         | 0.3431525 | 0.065529 |
| Unmapped000000819.hg | PCYT1A        | 0.3410525 | 0.083707 |
| TC1000011673.hg.1    | PITX3         | 0.3404625 | 0.07981  |
| TC0700009696.hg.1    | CHPF2; MIR671 | 0.3385775 | 0.095007 |
| TC1200008107.hg.1    | RAP1B         | 0.33849   | 0.068526 |
| TC0500008849.hg.1    | CYSTM1        | 0.3313375 | 0.06381  |
| TC0800006873.hg.1    | PDGFRL        | 0.3303525 | 0.082814 |
| TC0400008086.hg.1    | IBSP          | 0.32945   | 0.088133 |
| TC0200007477.hg.1    | SOC55         | 0.3288325 | 0.092    |
| TC1900011114.hg.1    | LHB           | 0.3214525 | 0.089722 |
| TC0900010661.hg.1    | CDK20         | 0.3184675 | 0.099735 |
| TC1700011233.hg.1    | MRPS23        | 0.3176525 | 0.073421 |
| Unmapped000000525.hg | BCL2L14       | 0.3168325 | 0.090037 |
| TC0200016580.hg.1    | C2orf88       | 0.3149975 | 0.089615 |

|                   |                  |            |          |
|-------------------|------------------|------------|----------|
| TC0X00009695.hg.1 | LINC01496        | 0.31016    | 0.096085 |
| TC1200012642.hg.1 | S1-RDH5; RP11-64 | 0.3059575  | 0.095007 |
| TC0800006975.hg.1 | BMP1             | 0.3019175  | 0.091951 |
| TC0100007940.hg.1 | CAP1             | 0.2908725  | 0.089615 |
| TC1000011026.hg.1 | USP54            | -0.293345  | 0.092    |
| TC1200008800.hg.1 | UBE3B            | -0.29789   | 0.095007 |
| TC2000009014.hg.1 | NDRG3            | -0.30312   | 0.089615 |
| TC0900008286.hg.1 | SMC2             | -0.3077025 | 0.095007 |
| TC1500010072.hg.1 | SIN3A            | -0.3181075 | 0.092    |
| TC0700012959.hg.1 | EZH2             | -0.320915  | 0.064187 |
| TC2000007819.hg.1 | CSTF1            | -0.3265525 | 0.088133 |
| TC2100007474.hg.1 | PRMT2            | -0.331705  | 0.081662 |
| TC0900012225.hg.1 | RNF38            | -0.33424   | 0.081553 |
| TC0X00007205.hg.1 | HDAC6            | -0.3368325 | 0.074228 |
| TC0100017451.hg.1 | TP53BP2          | -0.337715  | 0.071772 |
| TC0600011225.hg.1 | HIST1H2AJ        | -0.3383125 | 0.096517 |
| TC1900007743.hg.1 | ZNF507           | -0.3389725 | 0.086099 |
| TC0100018390.hg.1 | SLC35E2          | -0.3394225 | 0.086605 |
| TC2000007218.hg.1 | CEP250           | -0.339945  | 0.08302  |
| TC0600007268.hg.1 | HIST1H4C         | -0.341805  | 0.088857 |
| TC1600007113.hg.1 | C16orf62         | -0.3485075 | 0.070844 |
| TC0600011465.hg.1 | EHMT2            | -0.34879   | 0.077921 |
| TC0500012162.hg.1 | BRD8             | -0.353885  | 0.065308 |
| TC0300011801.hg.1 | MINA             | -0.35862   | 0.095007 |
| TC0300011706.hg.1 | VGLL3            | -0.35959   | 0.067139 |
| TC1000007925.hg.1 | EIF4EBP2         | -0.3601875 | 0.096313 |
| TC0400012945.hg.1 | HSD17B11         | -0.3606375 | 0.088133 |
| TC1200010119.hg.1 | C2CD5            | -0.3617425 | 0.091951 |
| TC1900011968.hg.1 | XRCC1            | -0.36363   | 0.068526 |
| TC1300008426.hg.1 | USP12            | -0.3637175 | 0.08286  |
| TC0400006578.hg.1 | SH3BP2           | -0.36389   | 0.064187 |
| TC0200015080.hg.1 | PRKRA            | -0.3644825 | 0.098507 |
| TC1500010740.hg.1 | DTWD1            | -0.3681825 | 0.065308 |
| TC1900008904.hg.1 | KMT5C            | -0.3696175 | 0.081662 |
| TC0200010116.hg.1 | DFNB59           | -0.371265  | 0.092589 |
| TC0200015431.hg.1 | TMEM237          | -0.37163   | 0.073421 |
| TC0600011184.hg.1 | HIST1H2BJ        | -0.372195  | 0.087276 |
| TC0X00007889.hg.1 | DIAPH2           | -0.3724075 | 0.070844 |
| TC0100016969.hg.1 | KLHL12           | -0.37273   | 0.058863 |
| TC0200013531.hg.1 | KANSL3           | -0.379075  | 0.056379 |
| TC0200014192.hg.1 | SAP130           | -0.379785  | 0.091951 |
| TC1000006917.hg.1 | CACNB2           | -0.38186   | 0.098033 |
| TC0900007472.hg.1 | ANKRD20A1        | -0.385475  | 0.069123 |
| TC1000011040.hg.1 | CAMK2G           | -0.3859425 | 0.06786  |
| TC0600007287.hg.1 | HIST1H3E         | -0.3862    | 0.069108 |
| TC0900007115.hg.1 | GLIPR2           | -0.38626   | 0.084239 |
| TC0100018388.hg.1 | SLC35E2B         | -0.3863075 | 0.063352 |
| TC0400012432.hg.1 | HMGB2            | -0.38709   | 0.056379 |
| TC2200007574.hg.1 | PARVB            | -0.3871525 | 0.095007 |
| TC1400009912.hg.1 | GALC             | -0.387905  | 0.076471 |

|                       |                  |            |          |
|-----------------------|------------------|------------|----------|
| TC1900009198.hg.1     | BTBD2            | -0.38983   | 0.039397 |
| TC0800011679.hg.1     | ATAD2            | -0.39001   | 0.07611  |
| TC1500006999.hg.1     | NUSAP1           | -0.3908175 | 0.053804 |
| TC1400009829.hg.1     | CEP128           | -0.391325  | 0.092303 |
| TC0100009876.hg.1     | H2H2AA3; HIST2H2 | -0.3939625 | 0.088133 |
| TC0600007868.hg.1     | RNF8             | -0.39607   | 0.076471 |
| TC0600011870.hg.1     | DNPB1            | -0.3961925 | 0.090736 |
| TC0900009581.hg.1     | FREM1            | -0.3989875 | 0.087852 |
| TC1700007469.hg.1     | ATAD5            | -0.3991525 | 0.046604 |
| TC1000010917.hg.1     | LRRC20           | -0.399285  | 0.088857 |
| TC0100012490.hg.1     | C1orf233         | -0.3997425 | 0.09616  |
| TC1900011055.hg.1     | BSPH1            | -0.40126   | 0.090593 |
| TC1600011371.hg.1     | SLX1A; SLX1B     | -0.40195   | 0.080167 |
| TC2000009780.hg.1     | TCFL5            | -0.4021625 | 0.086719 |
| TC1100010856.hg.1     | OR5M9            | -0.402835  | 0.06786  |
| TC0100013608.hg.1     | MARCKSL1         | -0.40343   | 0.07981  |
| TC1700008331.hg.1     | HLF              | -0.4039625 | 0.080167 |
| TC0100008126.hg.1     | AKR1A1           | -0.4039875 | 0.096408 |
| TC0400010260.hg.1     | SEPSECS          | -0.404345  | 0.048814 |
| TC0600008780.hg.1     | CASP8AP2         | -0.4043975 | 0.072372 |
| TC2000007512.hg.1     | PCIF1            | -0.40518   | 0.039397 |
| TC0600011233.hg.1     | HIST1H3I         | -0.40622   | 0.087532 |
| TC0600007869.hg.1     | CMTR1            | -0.4066525 | 0.053882 |
| TC1900012000.hg.1     | TEAD2            | -0.40679   | 0.049941 |
| TC1500010731.hg.1     | TRIM69           | -0.4072825 | 0.070844 |
| TC0100007716.hg.1     | ZNF362           | -0.4077525 | 0.087852 |
| TC2200008610.hg.1     | FOXRED2          | -0.4078125 | 0.077921 |
| TC0200007929.hg.1     | GMCL1            | -0.4079225 | 0.092    |
| TC0700008755.hg.1     | DUS4L            | -0.4093425 | 0.049571 |
| TC0400012769.hg.1     | BST1             | -0.4096775 | 0.09271  |
| TC1200010917.hg.1     | TIMELESS         | -0.411655  | 0.061412 |
| TC0500007077.hg.1     | NPR3             | -0.4129075 | 0.068526 |
| TC1300007248.hg.1     | CKAP2            | -0.4129575 | 0.081193 |
| TC1700010618.hg.1     | TOP2A            | -0.4152875 | 0.052426 |
| TC0200013535.hg.1     | LMAN2L           | -0.4200775 | 0.098507 |
| TC0700011979.hg.1     | GPC2             | -0.4207025 | 0.089615 |
| TC1200012573.hg.1     | RHNO1            | -0.42234   | 0.043948 |
| TC1700011761.hg.1     | RECQL5           | -0.42318   | 0.053736 |
| TC0600007700.hg.1     | KIFC1            | -0.4271225 | 0.042782 |
| TC0100011581.hg.1     | CENPF            | -0.43036   | 0.057585 |
| TC2000008815.hg.1     | BCL2L1           | -0.4307275 | 0.061499 |
| TC0X00010804.hg.1     | ZNF280C          | -0.4308225 | 0.081307 |
| TC1400010624.hg.1     | PTGR2            | -0.4315475 | 0.082468 |
| TC0300011173.hg.1     | NT5DC2           | -0.43289   | 0.082751 |
| TC0600008863.hg.1     | MANEA            | -0.4331075 | 0.095007 |
| Unmapped00000242.hg.1 | KIF15            | -0.43438   | 0.053604 |
| TC0800007065.hg.1     | CDCA2            | -0.43524   | 0.084578 |
| TC1600008577.hg.1     | BCO1             | -0.435985  | 0.090698 |
| TC1100008847.hg.1     | CEP57            | -0.436105  | 0.032144 |
| TC0300012718.hg.1     | PLOD2            | -0.438605  | 0.086605 |

|                   |                   |            |          |
|-------------------|-------------------|------------|----------|
| TC1500008154.hg.1 | ZSCAN2            | -0.4398525 | 0.089615 |
| TC0400007868.hg.1 | PARM1             | -0.4399375 | 0.09887  |
| TC0400006994.hg.1 | NCAPG             | -0.442875  | 0.075663 |
| TC1200009649.hg.1 | CRACR2A           | -0.44553   | 0.042782 |
| TC0900010769.hg.1 | NFIL3             | -0.44666   | 0.070681 |
| TC0300013989.hg.1 | ABHD14B           | -0.4479475 | 0.06786  |
| TC1300007731.hg.1 | GPR180            | -0.4483325 | 0.077921 |
| TC0100016831.hg.1 | ASPM              | -0.4489325 | 0.032939 |
| TC1600011007.hg.1 | MPHOSPH6          | -0.4490475 | 0.065308 |
| TC0100008260.hg.1 | CDKN2C            | -0.450245  | 0.094938 |
| TC1700006592.hg.1 | GSG2              | -0.4515325 | 0.070844 |
| TC0X00009890.hg.1 | ZC4H2             | -0.45266   | 0.070844 |
| TC0X00006671.hg.1 | MOSPD2            | -0.45433   | 0.087276 |
| TC0100013854.hg.1 | SCMH1             | -0.4570725 | 0.060361 |
| TC0600007285.hg.1 | HIST1H2AE         | -0.4589225 | 0.055325 |
| TC1700009254.hg.1 | HEXDC             | -0.4608625 | 0.034155 |
| TC0100015701.hg.1 | HIST2H3A; HIST2H3 | -0.46108   | 0.099389 |
| TC0600012631.hg.1 | MMS22L            | -0.4612375 | 0.058367 |
| TC0200016561.hg.1 | KLHL23            | -0.4613425 | 0.04773  |
| TC1500010755.hg.1 | ANKDD1A           | -0.462325  | 0.053804 |
| TC1000008731.hg.1 | RPARP-AS1         | -0.462325  | 0.093965 |
| TC0300012140.hg.1 | GPR156            | -0.462585  | 0.09986  |
| TC0700012163.hg.1 | EFCAB10           | -0.462645  | 0.058214 |
| TC0900009592.hg.1 | PSIP1             | -0.46296   | 0.061889 |
| TC0200016563.hg.1 | KLHL23            | -0.46451   | 0.044574 |
| TC0200016753.hg.1 | CCDC141           | -0.46498   | 0.061141 |
| TC0900008497.hg.1 | ZNF618            | -0.465475  | 0.038026 |
| TC2100008467.hg.1 | C21orf58          | -0.4682975 | 0.020754 |
| TC1800009268.hg.1 | DSC2              | -0.46963   | 0.09271  |
| TC0400007582.hg.1 | KIAA1211          | -0.470155  | 0.070844 |
| TC0300011731.hg.1 | CGGBP1            | -0.471005  | 0.028639 |
| TC1000010847.hg.1 | DNA2              | -0.4718975 | 0.067824 |
| TC0X00006483.hg.1 | GYG2              | -0.4725775 | 0.046555 |
| TC0900007953.hg.1 | CENPP             | -0.4730375 | 0.07981  |
| TC0900009513.hg.1 | TMEM261           | -0.47555   | 0.049941 |
| TC2100007355.hg.1 | PFKL              | -0.47586   | 0.055555 |
| TC0900009673.hg.1 | MLLT3             | -0.475875  | 0.083707 |
| TC0700011318.hg.1 | ERV3-1; ZNF117    | -0.4767475 | 0.044208 |
| TC1600006904.hg.1 | RMI2              | -0.4768525 | 0.067139 |
| TC0100016364.hg.1 | SCYL3             | -0.4769075 | 0.048589 |
| TC1400008780.hg.1 | NOVA1             | -0.4770325 | 0.04756  |
| TC0100011472.hg.1 | HHAT              | -0.47744   | 0.048814 |
| TC0900010969.hg.1 | CORO2A            | -0.4775675 | 0.081553 |
| TC1500009639.hg.1 | ICE2              | -0.4796675 | 0.075663 |
| TC0100011871.hg.1 | HIST3H2BB         | -0.47976   | 0.039397 |
| TC0300013103.hg.1 | RPL22L1           | -0.4798075 | 0.063634 |
| TC1200012143.hg.1 | CIT; MIR1178      | -0.4806275 | 0.086605 |
| TC0300009126.hg.1 | GYG1              | -0.4807375 | 0.094546 |
| TC0900012180.hg.1 | PHYHD1            | -0.4811475 | 0.083707 |
| TC0500010085.hg.1 | CMBL              | -0.4822325 | 0.075569 |

|                       |                 |            |          |
|-----------------------|-----------------|------------|----------|
| TC0100018302.hg.1     | EFNA4           | -0.4823625 | 0.047126 |
| TC0100018200.hg.1     | SEPN1           | -0.4831975 | 0.022581 |
| TC1000007056.hg.1     | THNSL1          | -0.4840975 | 0.075569 |
| TC1700010802.hg.1     | MPP2            | -0.4842025 | 0.091803 |
| TC0200016684.hg.1     | TIA1            | -0.4844625 | 0.056379 |
| TC0600011255.hg.1     | ZSCAN23         | -0.4846475 | 0.088127 |
| TC0200015631.hg.1     | IKZF2           | -0.4853725 | 0.069087 |
| TC0100009877.hg.1     | HIST2H3A        | -0.4853775 | 0.078878 |
| TC1500007392.hg.1     | CCNB2           | -0.4854475 | 0.092    |
| TC0X00008055.hg.1     | TBC1D8B         | -0.48623   | 0.090736 |
| TC0400011524.hg.1     | TBCK            | -0.48681   | 0.047411 |
| TC1700007097.hg.1     | GID4            | -0.4890375 | 0.035368 |
| TC0400011477.hg.1     | CENPE           | -0.489285  | 0.061048 |
| TC0300012654.hg.1     | TFDP2           | -0.489395  | 0.095993 |
| TC1200007499.hg.1     | TMEM106C        | -0.4903475 | 0.049182 |
| TC0300007223.hg.1     | KIF15           | -0.4903875 | 0.079409 |
| TC1800008399.hg.1     | B4GALT6         | -0.490875  | 0.089615 |
| TC1000008471.hg.1     | KIF11           | -0.4909225 | 0.044134 |
| TC0600009459.hg.1     | ENPP1           | -0.49169   | 0.028639 |
| TC0900012120.hg.1     | IL11RA          | -0.49301   | 0.028639 |
| TC0200015869.hg.1     | AP1S3           | -0.4937475 | 0.070671 |
| TC1400008688.hg.1     | C14orf93        | -0.495935  | 0.078946 |
| TC0600011136.hg.1     | HIST1H2BG       | -0.4962775 | 0.059742 |
| Unmapped00000414.hg.1 | TMEM42          | -0.4976    | 0.076471 |
| TC1700009694.hg.1     | MYH10           | -0.4978075 | 0.070369 |
| TC0500011924.hg.1     | ALDH7A1         | -0.498205  | 0.028639 |
| TC1500007659.hg.1     | PIAS1           | -0.49851   | 0.019885 |
| TC0400008331.hg.1     | NPNT            | -0.4992775 | 0.067824 |
| TC1900008369.hg.1     | HIF3A           | -0.4995575 | 0.083408 |
| TC0100010553.hg.1     | C1orf112        | -0.50303   | 0.087338 |
| TC0600011235.hg.1     | ST1H2AM; HIST1H | -0.503475  | 0.087852 |
| TC1100008983.hg.1     | ACAT1           | -0.50845   | 0.048589 |
| TC1200006935.hg.1     | ATF7IP          | -0.5096375 | 0.09271  |
| TC0X00007936.hg.1     | CENPI           | -0.509905  | 0.056664 |
| TC0100015342.hg.1     | SYT6            | -0.5107325 | 0.058205 |
| TC0200009687.hg.1     | ARL6IP6         | -0.51075   | 0.089615 |
| TC2000008200.hg.1     | PCED1A          | -0.5120475 | 0.061499 |
| TC0600010235.hg.1     | MLLT4           | -0.5131225 | 0.089722 |
| TC0800006869.hg.1     | SLC7A2          | -0.513165  | 0.043948 |
| TC0400009223.hg.1     | CPE             | -0.513805  | 0.077005 |
| TC0700008617.hg.1     | SH2B2           | -0.5142225 | 0.026984 |
| TC0200010658.hg.1     | CPS1            | -0.51697   | 0.095007 |
| TC1000010070.hg.1     | PRTFDC1         | -0.5171025 | 0.08062  |
| TC0100009788.hg.1     | BCL9            | -0.517355  | 0.027265 |
| TC0600012817.hg.1     | AK9             | -0.52058   | 0.0939   |
| TC0600007374.hg.1     | HIST1H2AI       | -0.52143   | 0.076471 |
| TC0500013392.hg.1     | CCNJL           | -0.5220125 | 0.034346 |
| TC0600011232.hg.1     | HIST1H1B        | -0.5221    | 0.061465 |
| TC1200012706.hg.1     | ACAD10          | -0.5227175 | 0.047411 |
| TC0100018417.hg.1     | ALDH4A1         | -0.5229875 | 0.045766 |

|                   |                |            |          |
|-------------------|----------------|------------|----------|
| TC0200016494.hg.1 | CNNM4          | -0.5242125 | 0.022541 |
| TC0700010437.hg.1 | RAPGEF5        | -0.524235  | 0.03393  |
| TC0100010301.hg.1 | VANGL2         | -0.5249025 | 0.081256 |
| TC0500011804.hg.1 | DTWD2          | -0.5251725 | 0.028639 |
| TC0600008462.hg.1 | COL19A1        | -0.52734   | 0.087532 |
| TC1400008919.hg.1 | CFL2           | -0.528295  | 0.09986  |
| TC0900011769.hg.1 | FAM78A         | -0.5285825 | 0.065308 |
| TC0200011551.hg.1 | ADI1           | -0.529505  | 0.019885 |
| TC1500007612.hg.1 | DIS3L          | -0.529675  | 0.054201 |
| TC0600012652.hg.1 | FAXC           | -0.5298825 | 0.052483 |
| TC0600014083.hg.1 | HIST1H2AG      | -0.5323125 | 0.026119 |
| TC1200009621.hg.1 | FOXM1          | -0.53304   | 0.048371 |
| TC0600007274.hg.1 | HIST1H2BD      | -0.5349775 | 0.053804 |
| TC0900009231.hg.1 | FAM69B         | -0.5353675 | 0.029311 |
| TC2200009336.hg.1 | NIPSNAP1       | -0.5355725 | 0.020416 |
| TC0X00010387.hg.1 | TMSB15A        | -0.53867   | 0.055814 |
| TC2000008123.hg.1 | NRSN2-AS1      | -0.5403275 | 0.035368 |
| TC0X00009057.hg.1 | MID1           | -0.54404   | 0.023634 |
| TC1000009919.hg.1 | TRDMT1         | -0.5451725 | 0.088133 |
| TC0100007562.hg.1 | TRNAU1AP       | -0.545625  | 0.092    |
| TC1900008113.hg.1 | LTBP4          | -0.546195  | 0.073126 |
| TC1900006991.hg.1 | SLC44A2        | -0.5476425 | 0.023084 |
| TC1200010050.hg.1 | LMO3           | -0.5487175 | 0.019885 |
| TC1200012666.hg.1 | TMEM19         | -0.549385  | 0.043968 |
| TC0100018285.hg.1 | NBPF19         | -0.5495725 | 0.037257 |
| TC0400012458.hg.1 | HPGD           | -0.5505225 | 0.037257 |
| TC0600008630.hg.1 | TTK            | -0.55092   | 0.081553 |
| TC0500011705.hg.1 | NREP           | -0.55134   | 0.021514 |
| TC0100013369.hg.1 | STMN1; MIR3917 | -0.5514425 | 0.015902 |
| TC0600007789.hg.1 | ZNF76          | -0.552015  | 0.024183 |
| TC0600013602.hg.1 | FBXO5          | -0.552495  | 0.043948 |
| TC0600011124.hg.1 | HIST1H3B       | -0.552555  | 0.083707 |
| TC0800011158.hg.1 | C8orf37        | -0.553665  | 0.087276 |
| TC2200007069.hg.1 | OSBP2          | -0.5548925 | 0.04434  |
| TC2100008095.hg.1 | PIGP           | -0.5579425 | 0.092    |
| TC1100008819.hg.1 | KDM4D          | -0.55817   | 0.038026 |
| TC0X00009867.hg.1 | SPIN4          | -0.5592275 | 0.040063 |
| TC0400012251.hg.1 | C4orf46        | -0.559305  | 0.076438 |
| TC1200011330.hg.1 | E2F7           | -0.5614775 | 0.042782 |
| TC0900011163.hg.1 | PTPN3          | -0.56193   | 0.047518 |
| TC1200009676.hg.1 | AKAP3          | -0.56201   | 0.068578 |
| TC1700008769.hg.1 | KCNJ2          | -0.564705  | 0.049814 |
| TC0X00010837.hg.1 | MBNL3          | -0.56491   | 0.039397 |
| TC0600013458.hg.1 | EPM2A          | -0.566615  | 0.047361 |
| TC1700009679.hg.1 | AURKB          | -0.5676475 | 0.088133 |
| TC1100011742.hg.1 | KCTD21         | -0.569855  | 0.063209 |
| TC0600010802.hg.1 | ELOVL2         | -0.5698775 | 0.024183 |
| TC1200011327.hg.1 | CSRP2          | -0.57013   | 0.043948 |
| TC0500008582.hg.1 | ISOC1          | -0.5707275 | 0.032531 |
| TC0500007143.hg.1 | SKP2           | -0.573355  | 0.081193 |

|                   |                   |            |          |
|-------------------|-------------------|------------|----------|
| TC1800008070.hg.1 | PIEZO2            | -0.5748775 | 0.091951 |
| TC1200007891.hg.1 | DTX3              | -0.5767925 | 0.016877 |
| TC1800007411.hg.1 | NEDD4L            | -0.5780075 | 0.032144 |
| TC0100008607.hg.1 | RAVER2            | -0.578775  | 0.026407 |
| TC0100009870.hg.1 | HIST2H4B; HIST2H4 | -0.5821925 | 0.070844 |
| TC1900010360.hg.1 | ANKRD27           | -0.58267   | 0.047411 |
| TC0300011314.hg.1 | C3orf67           | -0.5849625 | 0.063352 |
| TC1100006773.hg.1 | TUB               | -0.586995  | 0.054722 |
| TC1200007630.hg.1 | LETMD1            | -0.58719   | 0.043948 |
| TC1400010714.hg.1 | HAUS4; MIR4707    | -0.5903825 | 0.04756  |
| TC1100010026.hg.1 | LMO1              | -0.593495  | 0.047361 |
| TC0500008437.hg.1 | TNFAIP8           | -0.5948025 | 0.04434  |
| TC0600011135.hg.1 | ST1H3D; HIST1H2A  | -0.6002    | 0.063352 |
| TC0700013338.hg.1 | GLCC1             | -0.6007975 | 0.08302  |
| TC0100015707.hg.1 | HIST2H4A; HIST2H4 | -0.60244   | 0.061048 |
| TC1700011181.hg.1 | MMD               | -0.604425  | 0.027997 |
| TC1000006862.hg.1 | OLAH              | -0.6044475 | 0.04756  |
| TC0900012155.hg.1 | MSANTD3-TMEFF1    | -0.6060125 | 0.028639 |
| TC2200007620.hg.1 | FBLN1             | -0.6075175 | 0.033907 |
| TC1600011449.hg.1 | SPIRE2            | -0.6078375 | 0.020295 |
| TC0200010907.hg.1 | ACSL3             | -0.6078375 | 0.048814 |
| TC1900007113.hg.1 | DAND5             | -0.61008   | 0.063352 |
| TC0600011228.hg.1 | HIST1H2AK         | -0.610305  | 0.079699 |
| TC0900012154.hg.1 | TMEFF1            | -0.6116975 | 0.021503 |
| TC0900007740.hg.1 | RMI1              | -0.61218   | 0.028796 |
| TC0400008348.hg.1 | HADH              | -0.61229   | 0.022541 |
| TC1100010792.hg.1 | FOLH1             | -0.6134675 | 0.080883 |
| TC1200008597.hg.1 | GAS2L3            | -0.6162675 | 0.055828 |
| TC1700006611.hg.1 | CYB5D2            | -0.617635  | 0.028639 |
| TC0100018440.hg.1 | STIL              | -0.619     | 0.059872 |
| TC0600008632.hg.1 | BCKDHB            | -0.6212275 | 0.024301 |
| TC0200015087.hg.1 | SESTD1            | -0.6242475 | 0.078749 |
| TC0600014084.hg.1 | HIST1H4I          | -0.62729   | 0.032948 |
| TC0100015711.hg.1 | HIST2H2AB         | -0.63107   | 0.027894 |
| TC0100017358.hg.1 | SLC30A10          | -0.631445  | 0.040063 |
| TC0600008319.hg.1 | FAM83B            | -0.63757   | 0.019857 |
| TC0700011905.hg.1 | BAIAP2L1          | -0.6401625 | 0.053604 |
| TC1100012229.hg.1 | KDELC2            | -0.6413525 | 0.028639 |
| TC0200012754.hg.1 | FAM161A           | -0.64235   | 0.070844 |
| TC0200015650.hg.1 | FN1               | -0.642975  | 0.057653 |
| TC0600007301.hg.1 | BTN3A2            | -0.643595  | 0.0134   |
| TC0600007282.hg.1 | HIST1H2BF         | -0.6442425 | 0.091951 |
| TC1200007892.hg.1 | ARHGEF25          | -0.6452775 | 0.012696 |
| TC2000007089.hg.1 | TPX2              | -0.6465225 | 0.019857 |
| TC1000010758.hg.1 | RTKN2             | -0.64655   | 0.026376 |
| TC0900011246.hg.1 | ZNF883            | -0.64673   | 0.090778 |
| TC1700010560.hg.1 | PLXDC1            | -0.6474825 | 0.029223 |
| TC0700009083.hg.1 | AHCYL2            | -0.65429   | 0.07611  |
| TC2200007672.hg.1 | GRAMD4            | -0.656595  | 0.063597 |
| TC0900009606.hg.1 | BNC2              | -0.6580725 | 0.061048 |

|                      |            |            |          |
|----------------------|------------|------------|----------|
| TC0200010421.hg.1    | AOX1       | -0.6602825 | 0.077675 |
| iUnmapped00000732.hg | SLC37A4    | -0.661065  | 0.070844 |
| TC1600011375.hg.1    | QPRT       | -0.6633925 | 0.068526 |
| TC0700013342.hg.1    | CHN2       | -0.6654175 | 0.030072 |
| TC0X00006791.hg.1    | PTCHD1     | -0.6654625 | 0.082468 |
| TC0600011138.hg.1    | HIST1H1D   | -0.666355  | 0.047927 |
| TC0200013376.hg.1    | EIF2AK3    | -0.6663825 | 0.022541 |
| TC1800006484.hg.1    | NDC80      | -0.666565  | 0.090778 |
| TC0300007077.hg.1    | ACVR2B     | -0.66866   | 0.030104 |
| TC1400009770.hg.1    | ZDHHC22    | -0.6698625 | 0.061141 |
| TC0300011324.hg.1    | FHIT       | -0.670895  | 0.079699 |
| TC0X00009107.hg.1    | GEMIN8     | -0.6780575 | 0.054722 |
| TC0300008853.hg.1    | TMEM108    | -0.67977   | 0.009488 |
| TC1300009984.hg.1    | SLITRK5    | -0.687275  | 0.023634 |
| TC0600011224.hg.1    | HIST1H2BL  | -0.68838   | 0.037257 |
| TC0200014785.hg.1    | FIGN       | -0.6893825 | 0.061033 |
| TC0X00008017.hg.1    | PLP1       | -0.69166   | 0.08286  |
| TC2100007872.hg.1    | GRIK1      | -0.6922025 | 0.092589 |
| TC1900008012.hg.1    | CATSPERG   | -0.6937725 | 0.036649 |
| TC1800008317.hg.1    | ZNF521     | -0.69379   | 0.013435 |
| TC0400010242.hg.1    | PPARGC1A   | -0.6955275 | 0.038873 |
| TC0X00011083.hg.1    | TMEM185A   | -0.69785   | 0.017943 |
| TC1900007688.hg.1    | CCNE1      | -0.6995975 | 0.089615 |
| TC0200015601.hg.1    | KANSL1L    | -0.7008075 | 0.062066 |
| TC0300014073.hg.1    | PLCH1      | -0.7066325 | 0.011167 |
| TC0400012473.hg.1    | GPM6A      | -0.7091075 | 0.084891 |
| TC0900007904.hg.1    | SYK        | -0.711215  | 0.013133 |
| TC1200010795.hg.1    | RARG       | -0.716465  | 0.036584 |
| TC0100008779.hg.1    | ST6GALNAC3 | -0.716785  | 0.019885 |
| TC1700011364.hg.1    | BRIP1      | -0.7214625 | 0.008043 |
| TC1400010777.hg.1    | TC2N       | -0.7342875 | 0.028639 |
| TC1800009029.hg.1    | CYB5A      | -0.7359325 | 0.017866 |
| TC0200014845.hg.1    | SPC25      | -0.7360025 | 0.038773 |
| TC1100007430.hg.1    | GYLTL1B    | -0.7398125 | 0.09616  |
| TC0X00006891.hg.1    | GK         | -0.74031   | 0.039397 |
| TC0500011157.hg.1    | GCNT4      | -0.740835  | 0.019857 |
| TC1000009851.hg.1    | FRMD4A     | -0.741735  | 0.022541 |
| TC0600011123.hg.1    | HIST1H4B   | -0.7418625 | 0.04756  |
| TC0600011127.hg.1    | HIST1H1C   | -0.7450425 | 0.034278 |
| TC0800012330.hg.1    | NDUFAF6    | -0.745605  | 0.042782 |
| TC1600010532.hg.1    | CDH8       | -0.7462675 | 0.009488 |
| TC1300006802.hg.1    | BRCA2      | -0.748595  | 0.008043 |
| TC0600007375.hg.1    | HIST1H3H   | -0.751355  | 0.021503 |
| TC1000010843.hg.1    | PBLD       | -0.75385   | 0.033907 |
| TC0500012662.hg.1    | ZBED8      | -0.75501   | 0.068526 |
| TC1200012741.hg.1    | ANO2       | -0.7587225 | 0.019561 |
| TC1200010490.hg.1    | NELL2      | -0.75927   | 0.008043 |
| TC1100012526.hg.1    | USP2       | -0.76691   | 0.048814 |
| TC0700007426.hg.1    | ADCY1      | -0.7716925 | 0.014123 |
| iUnmapped00000754.hg | FMN1       | -0.7721725 | 0.017665 |



|                       |               |            |          |
|-----------------------|---------------|------------|----------|
| TC1600009545.hg.1     | ABCC6         | -0.7737525 | 0.009083 |
| TC0400006639.hg.1     | NSG1; D4S234E | -0.77496   | 0.01508  |
| TC0100016431.hg.1     | TNFSF4        | -0.7750025 | 0.061048 |
| TC0700006619.hg.1     | SLC29A4       | -0.7821825 | 0.013906 |
| TC1000009714.hg.1     | PRKCQ         | -0.7865475 | 0.085207 |
| TC1600009954.hg.1     | MAPK3         | -0.7881425 | 0.006068 |
| TC1000008995.hg.1     | ATRNL1        | -0.7920075 | 0.035368 |
| TC1900008946.hg.1     | GALP          | -0.795335  | 0.036992 |
| Unmapped00000626.hg.1 | FMN1          | -0.8010875 | 0.038026 |
| TC1700012457.hg.1     | AXIN2         | -0.8048775 | 0.011167 |
| TC1100011886.hg.1     | RAB38         | -0.810565  | 0.055828 |
| TC0400008879.hg.1     | GAB1          | -0.8180225 | 0.040117 |
| TC1100008553.hg.1     | KCTD21-AS1    | -0.8191725 | 0.034155 |
| TC1500010160.hg.1     | CTSH          | -0.81979   | 0.025348 |
| TC0600009710.hg.1     | STX11         | -0.82215   | 0.041278 |
| TC0100009333.hg.1     | GPSM2         | -0.822295  | 0.014765 |
| TC0900006438.hg.1     | DOCK8         | -0.82655   | 0.019885 |
| TC0100009241.hg.1     | S1PR1         | -0.8277725 | 0.049675 |
| TC1000007072.hg.1     | APBB1IP       | -0.82867   | 0.019885 |
| TC0200016555.hg.1     | TBR1          | -0.82908   | 0.009488 |
| TC0100014543.hg.1     | DEPDC1        | -0.831875  | 0.053738 |
| TC0400009258.hg.1     | PALLD         | -0.8327325 | 0.021254 |
| TC1200006647.hg.1     | GNB3          | -0.8337175 | 0.05059  |
| TC0900009905.hg.1     | CNTFR         | -0.8349375 | 0.08467  |
| TC0300012112.hg.1     | B4GALT4       | -0.840175  | 0.023634 |
| TC0200014790.hg.1     | GRB14         | -0.840755  | 0.088127 |
| TC1200011588.hg.1     | USP44         | -0.849695  | 0.009372 |
| TC1400009684.hg.1     | ALDH6A1       | -0.85366   | 0.09271  |
| TC1500010422.hg.1     | IDH2          | -0.85662   | 0.008237 |
| TC0600012597.hg.1     | EPHA7         | -0.86599   | 0.028639 |
| TC1800007052.hg.1     | ASXL3         | -0.86946   | 0.00672  |
| TC0600008303.hg.1     | LRRC1         | -0.8702175 | 0.007953 |
| TC0400009543.hg.1     | TLR3          | -0.874755  | 0.036649 |
| TC0800011243.hg.1     | FBXO43        | -0.87494   | 0.043948 |
| TC0200016073.hg.1     | KCNJ13        | -0.8829675 | 0.002555 |
| TC0800009970.hg.1     | PBK           | -0.9007775 | 0.088857 |
| TC0400012798.hg.1     | ADGRL3        | -0.9028775 | 0.060052 |
| TC0100016218.hg.1     | RGS5          | -0.90433   | 0.060052 |
| TC1500008794.hg.1     | OCA2          | -0.90957   | 0.063352 |
| TC0500008454.hg.1     | PRR16         | -0.90989   | 0.042782 |
| TC1000008875.hg.1     | ADD3          | -0.91225   | 0.039397 |
| TC0X00011279.hg.1     | TSPAN7        | -0.9235    | 0.036059 |
| TC1200011460.hg.1     | KITLG         | -0.923775  | 0.084891 |
| TC1100010237.hg.1     | ABCC8         | -0.934985  | 0.029311 |
| TC0400009860.hg.1     | STX18         | -0.9354225 | 0.008708 |
| TC1200009985.hg.1     | GSG1          | -0.938585  | 0.008043 |
| TC1000008271.hg.1     | CDHR1         | -0.9505275 | 0.026984 |
| TC0400011916.hg.1     | PCDH18        | -0.9615175 | 0.047361 |
| TC0800012322.hg.1     | CA13          | -0.97362   | 0.005816 |
| TC1200011246.hg.1     | PTPRR         | -0.97829   | 0.050492 |

|                     |                   |            |          |
|---------------------|-------------------|------------|----------|
| TC1400009617.hg.1   | DPF3              | -0.9976825 | 0.014765 |
| TC0700008873.hg.1   | CAV1              | -1.009893  | 0.017376 |
| TC0200015093.hg.1   | ZNF385B           | -1.013732  | 0.022805 |
| TC1000012213.hg.1   | FAM196A           | -1.016845  | 0.057655 |
| TC1100012794.hg.1   | ARHGAP32          | -1.01755   | 0.070844 |
| TC1300008894.hg.1   | RCBTB2            | -1.031955  | 0.008694 |
| TC0400007542.hg.1   | KIT               | -1.041875  | 0.009372 |
| TC0X00006709.hg.1   | NHS               | -1.043988  | 0.008043 |
| TC0600008038.hg.1   | GUCA1A            | -1.046247  | 0.013435 |
| TC1700007408.hg.1   | PIPOX             | -1.059825  | 0.027265 |
| TC1500008350.hg.1   | SV2B              | -1.06046   | 0.028639 |
| TC1000011114.hg.1   | KCNMA1            | -1.072185  | 0.024914 |
| TC1900011507.hg.1   | ZSCAN5B           | -1.083235  | 0.040396 |
| TC1700011574.hg.1   | ABCA8             | -1.08391   | 0.003329 |
| Unmapped00000713.hg | FMN1              | -1.11694   | 0.019857 |
| TC0500010615.hg.1   | SEPP1             | -1.117025  | 0.034278 |
| TC0400009037.hg.1   | MND1              | -1.142222  | 0.069087 |
| TC1600007448.hg.1   | CORO1A            | -1.14618   | 0.020484 |
| TC1800006571.hg.1   | ARHGAP28          | -1.151803  | 0.048814 |
| TC0200016755.hg.1   | NEUROD1           | -1.16906   | 0.068526 |
| TC0300011251.hg.1   | ERC2              | -1.18397   | 0.00672  |
| TC0300008271.hg.1   | BBX               | -1.194727  | 0.011167 |
| TC0100008496.hg.1   | FGGY              | -1.2180675 | 0.054536 |
| TC0X00010428.hg.1   | GLRA4             | -1.239075  | 0.019885 |
| TC0100011788.hg.1   | MIXL1             | -1.2484375 | 0.015902 |
| TC0400011263.hg.1   | SPARCL1           | -1.288755  | 0.083707 |
| Unmapped00000559.hg | FMN1              | -1.304358  | 0.015985 |
| TC1700008757.hg.1   | MAP2K6            | -1.30536   | 0.009083 |
| TC0200014728.hg.1   | 5-CD302; CD302; L | -1.339482  | 0.040117 |
| TC1400007441.hg.1   | AKAP5             | -1.368015  | 0.003981 |
| TC1000012579.hg.1   | IT1; ARHGAP19-SLI | -1.371058  | 0.008995 |
| TC1700010019.hg.1   | MFAP4             | -1.373882  | 0.024914 |
| TC0300011852.hg.1   | IMPG2             | -1.416033  | 0.019885 |
| TC0800008028.hg.1   | PKIA              | -1.475145  | 0.021679 |
| TC0100017307.hg.1   | USH2A             | -1.502125  | 0.013395 |
| TC1200008176.hg.1   | LGR5              | -1.504503  | 0.009083 |
| TC0100016254.hg.1   | RXRG              | -1.5780325 | 0.035469 |
| TC0500008470.hg.1   | SNCAIP            | -1.747532  | 0.033595 |
| TC1700008673.hg.1   | CACNG5            | -1.814355  | 0.003243 |
| TC0500009301.hg.1   | GABRA6            | -1.859058  | 0.015985 |
| TC1400006562.hg.1   | RPGRIP1           | -2.01608   | 0.001682 |
| TC1300009488.hg.1   | DCT               | -3.01387   | 0.006068 |

## U87 NS

| Affymetrix_ID       | GeneSymbol      | logFC (PEF/Sham) | adj.P.Val   |
|---------------------|-----------------|------------------|-------------|
| TC2200008515.hg.1   | BPIFC           | 1.1567775        | 0.004027064 |
| TC1200010755.hg.1   | KRT75           | 1.1315325        | 0.009877926 |
| TC0500012392.hg.1   | SPINK1          | 0.88713          | 0.031290592 |
| TC0300011951.hg.1   | MORC1           | 0.83622          | 0.069665424 |
| TC0100015847.hg.1   | SPRR2D          | 0.819075         | 0.005200956 |
| TC0700009134.hg.1   | CPA4            | 0.81749          | 0.01247524  |
| TC0800008140.hg.1   | ATP6V0D2        | 0.80054          | 0.011058322 |
| TC0200016511.hg.1   | IL1RN           | 0.7707775        | 0.005200956 |
| TC1500007409.hg.1   | GCNT3           | 0.751575         | 0.011726578 |
| TC0800011646.hg.1   | HAS2            | 0.729155         | 0.005200956 |
| TC0700011876.hg.1   | ASNS            | 0.7238675        | 0.005637494 |
| TC0700009145.hg.1   | MEST            | 0.7146725        | 0.011058322 |
| TC0800008667.hg.1   | NOV             | 0.7090225        | 0.004027064 |
| TC0400007776.hg.1   | FDCSP           | 0.661655         | 0.013312527 |
| TC1800006733.hg.1   | PRELID3A        | 0.6435375        | 0.005200956 |
| TC1700011558.hg.1   | SLC16A6         | 0.639685         | 0.011058322 |
| TC0200013922.hg.1   | IL36B           | 0.6345075        | 0.008102    |
| TC2000008971.hg.1   | GDF5            | 0.6232775        | 0.0114496   |
| TC0800012386.hg.1   | PINX1; MIR1322  | 0.6196325        | 0.009877926 |
| TC0500012870.hg.1   | STC2            | 0.61875          | 0.004027064 |
| TC1000007176.hg.1   | MAP3K8          | 0.610515         | 0.067443164 |
| TC2200007204.hg.1   | HMOX1           | 0.60623          | 0.0114496   |
| TC0900010971.hg.1   | TBC1D2          | 0.594405         | 0.025547592 |
| TC2200007523.hg.1   | SERHL           | 0.593735         | 0.043671166 |
| TC1100012717.hg.1   | PUS3            | 0.5899625        | 0.019594536 |
| TC0200013899.hg.1   | ZC3H8           | 0.5717025        | 0.026473153 |
| TC0100009394.hg.1   | CD53            | 0.567535         | 0.021228758 |
| TC0900009861.hg.1   | NOL6            | 0.562815         | 0.0114496   |
| TC0300008550.hg.1   | CSTA            | 0.54724          | 0.066496062 |
| TC0700009411.hg.1   | MGAM2           | 0.54379          | 0.017257589 |
| TC1100013202.hg.1   | ORAOV1          | 0.53871          | 0.035844342 |
| TC1900006863.hg.1   | LRRC8E          | 0.53866          | 0.046330913 |
| TC0200016501.hg.1   | IL1RL1          | 0.5358525        | 0.0114496   |
| TC0X00008392.hg.1   | UTP14A          | 0.5293425        | 0.011058322 |
| TC0900007667.hg.1   | PSAT1           | 0.5266675        | 0.008102    |
| TC0700010582.hg.1   | HIBADH          | 0.526495         | 0.066245496 |
| TC0500008632.hg.1   | SLC22A5         | 0.5218825        | 0.0512073   |
| TC0700011010.hg.1   | SUN3            | 0.5121825        | 0.030721619 |
| TC0500012760.hg.1   | SLIT3           | 0.5106325        | 0.067443164 |
| TC1000011992.hg.1   | SFXN4           | 0.5104925        | 0.021865032 |
| TC0100016006.hg.1   | GPATCH4         | 0.50834          | 0.008102    |
| TC1900010836.hg.1   | PSG4            | 0.500735         | 0.025547592 |
| Unmapped00000292.hg | TGM4            | 0.4998025        | 0.09268633  |
| TC1600011347.hg.1   | ALG1; NAGPA-AS1 | 0.497595         | 0.076707853 |
| TC0700013579.hg.1   | SEMA3A          | 0.4948275        | 0.092203455 |
| TC1800009242.hg.1   | SERPINB2        | 0.4896025        | 0.021865032 |
| TC1100007884.hg.1   | SLC3A2          | 0.487385         | 0.010955303 |
| TC1000009169.hg.1   | ACADSB          | 0.48605          | 0.065232968 |

|                   |              |           |             |
|-------------------|--------------|-----------|-------------|
| TC0200014764.hg.1 | DPP4         | 0.485315  | 0.040810003 |
| TC1600011186.hg.1 | SLC7A5       | 0.4850525 | 0.011058322 |
| TC1400010195.hg.1 | WARS         | 0.48459   | 0.01247524  |
| TC0100018492.hg.1 | SPRR2A       | 0.4813425 | 0.019594536 |
| TC1000007976.hg.1 | CHST3        | 0.4744125 | 0.017263356 |
| TC0400010141.hg.1 | LDB2         | 0.4673125 | 0.092638529 |
| TC1200008606.hg.1 | UTP20        | 0.465655  | 0.062798851 |
| TC1500008304.hg.1 | GDPGP1       | 0.4645875 | 0.046873561 |
| TC1500008202.hg.1 | AGBL1        | 0.4645    | 0.046330913 |
| TC0100014210.hg.1 | COA7         | 0.4626325 | 0.034996871 |
| TC0700012971.hg.1 | ZNF425       | 0.46113   | 0.085962898 |
| TC1600009677.hg.1 | CRYM         | 0.4592375 | 0.033167433 |
| TC1100013012.hg.1 | STX3         | 0.456645  | 0.012075777 |
| TC0400012989.hg.1 | TMEM192      | 0.4555625 | 0.097429958 |
| TC0400012941.hg.1 | THAP9-AS1    | 0.45519   | 0.049561569 |
| TC0400012874.hg.1 | CYP4V2       | 0.454755  | 0.01247524  |
| TC1700012460.hg.1 | ABCA5        | 0.453065  | 0.091684275 |
| TC0700009240.hg.1 | AGBL3        | 0.45297   | 0.089179173 |
| TC0100010713.hg.1 | PAPPA2       | 0.45211   | 0.092548463 |
| TC0200016344.hg.1 | MTERF4       | 0.4510075 | 0.013312527 |
| TC0100014502.hg.1 | WDR78        | 0.4489125 | 0.094919693 |
| TC0400007285.hg.1 | LIAS         | 0.4487075 | 0.085583092 |
| TC2200006832.hg.1 | RAB36        | 0.44585   | 0.02238493  |
| TC0700013067.hg.1 | SMARCD3      | 0.442155  | 0.066567516 |
| TC2000009259.hg.1 | NCOA5        | 0.43869   | 0.024152102 |
| TC0900010792.hg.1 | NOL8         | 0.438295  | 0.046873561 |
| TC1700006585.hg.1 | CTNS         | 0.43482   | 0.049010227 |
| TC0X00007107.hg.1 | KRBOX4       | 0.43389   | 0.022248627 |
| TC0700013441.hg.1 | IFRD1        | 0.4321075 | 0.011058322 |
| TC1300007870.hg.1 | ITGBL1       | 0.43065   | 0.052112489 |
| TC0400009137.hg.1 | FNIP2        | 0.4247025 | 0.073252833 |
| TC0700012148.hg.1 | SRPK2        | 0.42385   | 0.046873561 |
| TC0900010886.hg.1 | PTCH1        | 0.4228775 | 0.03435774  |
| TC0600013542.hg.1 | ULBP3        | 0.4226575 | 0.043671166 |
| TC0500007138.hg.1 | IL7R         | 0.42179   | 0.031580265 |
| TC1000008665.hg.1 | C10orf2      | 0.421485  | 0.033221637 |
| TC0X00010652.hg.1 | UPF3B        | 0.4211975 | 0.020215418 |
| TC0300007015.hg.1 | ARPP21       | 0.4205225 | 0.026457334 |
| TC0100013602.hg.1 | TMEM234      | 0.4189625 | 0.033273608 |
| TC0100009204.hg.1 | TRMT13       | 0.415525  | 0.037818217 |
| TC0800006913.hg.1 | SH2D4A       | 0.4136975 | 0.04800286  |
| TC0100006991.hg.1 | RSC1A1; DDI2 | 0.4131575 | 0.033167433 |
| TC0300008336.hg.1 | C3orf52      | 0.4111725 | 0.034996871 |
| TC0900007452.hg.1 | ZNF658       | 0.41066   | 0.094396878 |
| TC0400007923.hg.1 | MRPL1        | 0.410005  | 0.034996871 |
| TC1500006788.hg.1 | GREM1        | 0.408665  | 0.040810003 |
| TC1000008770.hg.1 | PDCD11       | 0.4082675 | 0.034332503 |
| TC0200008949.hg.1 | IL36RN       | 0.406585  | 0.017759987 |
| TC0200012642.hg.1 | MTIF2        | 0.40577   | 0.021850769 |
| TC1200008792.hg.1 | UNG          | 0.40494   | 0.0512073   |

|                   |                    |           |             |
|-------------------|--------------------|-----------|-------------|
| TC1600010498.hg.1 | SLC38A7            | 0.4046575 | 0.040005001 |
| TC0500012568.hg.1 | GEMIN5             | 0.4029825 | 0.054474791 |
| TC0900008318.hg.1 | TMEM38B            | 0.4026825 | 0.027911185 |
| TC1200008748.hg.1 | PWP1               | 0.4025475 | 0.061960415 |
| TC2000006541.hg.1 | ITPA               | 0.40153   | 0.053535836 |
| TC1700009150.hg.1 | BAIAP2             | 0.400905  | 0.038822528 |
| TC0100009621.hg.1 | PHGDH              | 0.4009025 | 0.025111113 |
| TC1900011978.hg.1 | ZNF296             | 0.40042   | 0.059928963 |
| TC0200013137.hg.1 | GCFC2              | 0.40038   | 0.052350227 |
| TC0400012396.hg.1 | AADAT              | 0.399945  | 0.0512073   |
| TC0400012934.hg.1 | SDAD1              | 0.3981675 | 0.092203455 |
| TC1500010723.hg.1 | CHAC1              | 0.39776   | 0.099093194 |
| TC1500009639.hg.1 | ICE2               | 0.3966625 | 0.072373494 |
| TC0100015851.hg.1 | SPRR2E             | 0.3961825 | 0.0512073   |
| TC1100012209.hg.1 | ALKBH8             | 0.393825  | 0.033225252 |
| TC1500007355.hg.1 | AQP9               | 0.3937625 | 0.014112572 |
| TC1400008583.hg.1 | CCNB1IP1; SNORD126 | 0.3933475 | 0.100575866 |
| TC1900011775.hg.1 | GRWD1              | 0.39292   | 0.05919168  |
| TC2200007406.hg.1 | ATF4               | 0.392545  | 0.049283756 |
| TC0300014095.hg.1 | TM4SF19            | 0.3919675 | 0.094396878 |
| TC0400012179.hg.1 | PLRG1              | 0.391875  | 0.059776557 |
| TC0400010258.hg.1 | LGI2               | 0.391505  | 0.076707853 |
| TC0400008091.hg.1 | SPP1               | 0.3912075 | 0.049240832 |
| TC2200008932.hg.1 | KIAA1644           | 0.3904925 | 0.042123027 |
| TC1200008729.hg.1 | POLR3B             | 0.3899125 | 0.0512073   |
| TC1900008564.hg.1 | ATF5; MIR4751      | 0.389675  | 0.064424936 |
| TC0900008380.hg.1 | FAM206A            | 0.3875875 | 0.065460505 |
| TC0300012186.hg.1 | CCDC58             | 0.3857775 | 0.055553424 |
| TC0200007115.hg.1 | CLIP4              | 0.384845  | 0.090665143 |
| TC0300006465.hg.1 | LRRN1              | 0.384825  | 0.094970292 |
| TC0200015514.hg.1 | GPR1               | 0.3841525 | 0.092004163 |
| TC0500007690.hg.1 | SERF1B; SERF1A     | 0.3826175 | 0.076769831 |
| TC0500007698.hg.1 | SERF1A             | 0.3826175 | 0.076769831 |
| TC0700012596.hg.1 | TMEM209            | 0.3825175 | 0.030139204 |
| TC0300011009.hg.1 | CDC25A             | 0.381665  | 0.033225252 |
| TC2000008318.hg.1 | FERMT1             | 0.38079   | 0.034996871 |
| TC0700013583.hg.1 | MTERF1             | 0.3802475 | 0.067361676 |
| TC0500007542.hg.1 | NDUFAF2            | 0.3800375 | 0.069665424 |
| TC0100013581.hg.1 | SPOCD1             | 0.37947   | 0.073798434 |
| TC0500013153.hg.1 | MTRR               | 0.3790825 | 0.021865032 |
| TC1100013075.hg.1 | DDIAS              | 0.377945  | 0.0512073   |
| TC0200010480.hg.1 | NOP58              | 0.377465  | 0.019594536 |
| TC0100017267.hg.1 | ANGEL2             | 0.3774275 | 0.0512073   |
| TC0500010869.hg.1 | ELOVL7             | 0.3760525 | 0.043671166 |
| TC1100012811.hg.1 | NFRKB              | 0.37522   | 0.063760834 |
| TC0200006891.hg.1 | RHOB               | 0.3751325 | 0.054591271 |
| TC0100009900.hg.1 | CIART              | 0.372915  | 0.043671166 |
| TC0200016702.hg.1 | POLR1A             | 0.3719425 | 0.042123027 |
| TC1600010809.hg.1 | TXNL4B             | 0.37165   | 0.059776557 |
| TC0100012921.hg.1 | DHRS3; MIR6730     | 0.37106   | 0.032071873 |

|                      |                      |           |             |
|----------------------|----------------------|-----------|-------------|
| TC0300012195.hg.1    | HSPBAP1              | 0.3708    | 0.053681113 |
| TC0800008487.hg.1    | RIMS2                | 0.36995   | 0.055553424 |
| TC2000008268.hg.1    | SLC23A2              | 0.3682825 | 0.072373494 |
| TC1900008036.hg.1    | MRPS12               | 0.368275  | 0.064399995 |
| TC0500012302.hg.1    | GNPDA1               | 0.3674575 | 0.0512073   |
| TC1900007418.hg.1    | ARMC6                | 0.36723   | 0.034996871 |
| TC1400007975.hg.1    | C14orf159            | 0.3665075 | 0.067443164 |
| TC1600011440.hg.1    | OSGIN1               | 0.3664175 | 0.085204682 |
| TC1000007847.hg.1    | MYPN                 | 0.3651675 | 0.03994713  |
| TC2200006636.hg.1    | 5CR8; MIR1306; MIR36 | 0.3643575 | 0.024152102 |
| TC0900011370.hg.1    | BRINP1               | 0.3639825 | 0.087508437 |
| TC1900008692.hg.1    | ZNF480               | 0.36192   | 0.033167433 |
| TC1000011904.hg.1    | ABLIM1               | 0.3608825 | 0.053535836 |
| TC0500010779.hg.1    | SLC38A9              | 0.3589775 | 0.059587735 |
| TC0200016772.hg.1    | NHEJ1                | 0.3588625 | 0.027911185 |
| 5Unmapped00000594.hg | GREM1                | 0.3586175 | 0.0512073   |
| TC0900009645.hg.1    | HAUS6                | 0.357725  | 0.053535836 |
| TC2100007822.hg.1    | ADAMTS5              | 0.3575875 | 0.021865032 |
| TC1200012714.hg.1    | HSPB8                | 0.3575625 | 0.040254667 |
| TC0500009123.hg.1    | SLC36A1              | 0.35691   | 0.093282551 |
| TC0X00010211.hg.1    | CHM                  | 0.3562975 | 0.06328314  |
| TC1200012650.hg.1    | MARS; MIR6758        | 0.356245  | 0.02654718  |
| TC1800009222.hg.1    | RNF125               | 0.3561975 | 0.084675912 |
| TC1100006976.hg.1    | MYOD1                | 0.35551   | 0.09268633  |
| TC0800007985.hg.1    | GDAP1                | 0.3540525 | 0.060671965 |
| TC0500011529.hg.1    | RIOK2                | 0.35063   | 0.0512073   |
| TC0100010872.hg.1    | SMG7                 | 0.350605  | 0.061588776 |
| TC1500009217.hg.1    | LCMT2                | 0.3501475 | 0.036955529 |
| TC1200008126.hg.1    | CPSF6                | 0.3501075 | 0.052434394 |
| TC0500011095.hg.1    | MRPS27               | 0.3497175 | 0.033221637 |
| TC0900009259.hg.1    | UAP1L1               | 0.34917   | 0.0512073   |
| TC0300014021.hg.1    | CPOX                 | 0.3487725 | 0.092203455 |
| TC0500012145.hg.1    | KLHL3                | 0.34829   | 0.092203455 |
| TC0700009692.hg.1    | SLC4A2               | 0.346065  | 0.055553424 |
| TC1000010411.hg.1    | ZNF33B               | 0.345245  | 0.099272227 |
| TC1100007826.hg.1    | BEST1                | 0.3441875 | 0.052143138 |
| TC0200008806.hg.1    | LIMS1                | 0.3439925 | 0.041963274 |
| TC1000007081.hg.1    | PDSS1                | 0.34384   | 0.043587405 |
| TC1900008180.hg.1    | ZNF526               | 0.3436225 | 0.024899557 |
| TC1500006977.hg.1    | VPS18                | 0.3420575 | 0.074271886 |
| TC0500013259.hg.1    | MFAP3                | 0.3415    | 0.049095383 |
| TC1500009597.hg.1    | MYO1E                | 0.340895  | 0.043804042 |
| TC0100009373.hg.1    | SLC6A17              | 0.340875  | 0.054474791 |
| TC1600010603.hg.1    | RRAD                 | 0.34057   | 0.027911185 |
| TC0800011887.hg.1    | ST3GAL1              | 0.3402275 | 0.039714129 |
| TC1800008779.hg.1    | NARS                 | 0.33964   | 0.071470684 |
| TC0100016364.hg.1    | SCYL3                | 0.3396225 | 0.083270988 |
| TC2000009198.hg.1    | ADA                  | 0.3395825 | 0.084213367 |
| TC0X00010409.hg.1    | BEX2                 | 0.33957   | 0.092203455 |
| TC0600012752.hg.1    | PDSS2                | 0.33926   | 0.078710038 |

|                       |                     |           |             |
|-----------------------|---------------------|-----------|-------------|
| TC1600009514.hg.1     | RRN3                | 0.339105  | 0.069975781 |
| TC1100011930.hg.1     | CHORDC1             | 0.3383525 | 0.083330937 |
| TC0X00010880.hg.1     | MOSPD1              | 0.338095  | 0.043671166 |
| TC1200010516.hg.1     | SLC38A1             | 0.337885  | 0.077859436 |
| TC0200008259.hg.1     | MAT2A               | 0.33752   | 0.072373494 |
| TC0X00007356.hg.1     | GNL3L               | 0.3369975 | 0.094919693 |
| TC0100008815.hg.1     | IFI44L              | 0.3366775 | 0.065232968 |
| TC2100008061.hg.1     | SETD4               | 0.3363875 | 0.069207837 |
| TC1100012984.hg.1     | NAT10               | 0.33553   | 0.052434394 |
| TC0200013894.hg.1     | ANAPC1              | 0.3334225 | 0.072373494 |
| TC0900009779.hg.1     | C9orf72             | 0.3333025 | 0.099272227 |
| TC1600008190.hg.1     | SLC7A6              | 0.333035  | 0.031751474 |
| TC0X00007923.hg.1     | CSTF2               | 0.3327325 | 0.069286354 |
| TC0200016651.hg.1     | CYP1B1              | 0.33166   | 0.059587735 |
| TC0400009791.hg.1     | NOP14               | 0.3315975 | 0.073895931 |
| TC0600014136.hg.1     | ADGRF4              | 0.3312225 | 0.082427867 |
| TC0400008335.hg.1     | AIMP1               | 0.330075  | 0.027898097 |
| TC0300009815.hg.1     | LPP                 | 0.3298575 | 0.055553424 |
| TC0800011683.hg.1     | FBXO32              | 0.329265  | 0.046330913 |
| TC2000006642.hg.1     | BMP2                | 0.328795  | 0.099876826 |
| TC0100008121.hg.1     | TOE1                | 0.3283525 | 0.046873561 |
| TC0800010458.hg.1     | TCEA1               | 0.3282175 | 0.037818217 |
| TC0700013396.hg.1     | CLDN12              | 0.32796   | 0.067443164 |
| TC0800008715.hg.1     | ZHX2                | 0.3265175 | 0.099876826 |
| TC0200016224.hg.1     | PER2                | 0.32648   | 0.094919693 |
| TC0500012937.hg.1     | NOP16               | 0.32591   | 0.069665424 |
| TC1000009002.hg.1     | PNLIPRP3            | 0.3256425 | 0.035844342 |
| TC1900008989.hg.1     | ZNF460              | 0.325375  | 0.043671166 |
| TC1700011917.hg.1     | USP36               | 0.3252825 | 0.056814452 |
| TC0200014049.hg.1     | TMEM185B            | 0.325165  | 0.072373494 |
| TC0100013629.hg.1     | YARS                | 0.3248375 | 0.049561569 |
| TC1400008705.hg.1     | SLC7A8              | 0.3245275 | 0.025740583 |
| TC2000006518.hg.1     | D56; SNORA51; SNORD | 0.32443   | 0.0512073   |
| TC1600011368.hg.1     | LAT                 | 0.32318   | 0.072373494 |
| TC0300006489.hg.1     | ARL8B               | 0.322245  | 0.092776123 |
| TC0100013184.hg.1     | MUL1                | 0.322205  | 0.061960415 |
| TC1100007050.hg.1     | PRMT3               | 0.3215275 | 0.069665424 |
| TC0200014907.hg.1     | SLC25A12            | 0.32096   | 0.067361676 |
| TC0100016263.hg.1     | TMCO1               | 0.3207375 | 0.092203455 |
| TC0200013641.hg.1     | CHST10              | 0.3201475 | 0.072373494 |
| TC0900011846.hg.1     | REXO4               | 0.3200825 | 0.070219298 |
| TC1700006774.hg.1     | CYB5D1              | 0.3200275 | 0.051196291 |
| TC0500009706.hg.1     | SQSTM1              | 0.3199525 | 0.034996871 |
| TC1500010887.hg.1     | CLN6                | 0.319785  | 0.057870475 |
| TC2200008447.hg.1     | PES1                | 0.3195075 | 0.034996871 |
| TC0100017118.hg.1     | YOD1                | 0.319055  | 0.087810386 |
| TCUnmapped00000090.hg | REXO4               | 0.3186325 | 0.046873561 |
| TC1100006831.hg.1     | ADM                 | 0.3184475 | 0.053535836 |
| TC1000011130.hg.1     | DLG5                | 0.31818   | 0.057278562 |
| TC0800011844.hg.1     | ADCY8               | 0.317575  | 0.072373494 |

|                     |                 |           |             |
|---------------------|-----------------|-----------|-------------|
| TC1100011022.hg.1   | VPS37C          | 0.3173    | 0.062084018 |
| TC2000008439.hg.1   | ESF1            | 0.316955  | 0.0512073   |
| TC0200007886.hg.1   | PNO1            | 0.3165075 | 0.071969365 |
| TC1600009966.hg.1   | DCTPP1          | 0.316495  | 0.092203455 |
| TC0100009344.hg.1   | SARS            | 0.316405  | 0.070749101 |
| TC1600010734.hg.1   | NOB1            | 0.3159625 | 0.060248261 |
| TC1900008323.hg.1   | CD3EAP          | 0.3154125 | 0.094771752 |
| Unmapped00000571.hg | GREM1           | 0.31485   | 0.05690032  |
| TC0100014964.hg.1   | DNTTIP2         | 0.31458   | 0.0512073   |
| TC1200008028.hg.1   | MSRB3           | 0.3142225 | 0.0512073   |
| TC1700006464.hg.1   | FAM57A          | 0.3142    | 0.099272227 |
| TC0200007111.hg.1   | WDR43; SNORD53  | 0.3136275 | 0.082880292 |
| TC0700008743.hg.1   | PIK3CG          | 0.3128525 | 0.058568607 |
| TC0300008352.hg.1   | GTPBP8          | 0.3126525 | 0.087810386 |
| TC1900011730.hg.1   | TIMM50          | 0.3123775 | 0.087590101 |
| TC2100007821.hg.1   | ADAMTS1         | 0.3106425 | 0.046649477 |
| TC1700009590.hg.1   | KIAA0753        | 0.31002   | 0.062798851 |
| TC2100008499.hg.1   | SMIM11A         | 0.3092825 | 0.056626913 |
| TC1700012342.hg.1   | DHX33           | 0.30897   | 0.0512073   |
| TC2100006460.hg.1   | SMIM11A         | 0.3085575 | 0.057802668 |
| TC0800007870.hg.1   | CSPP1           | 0.3085375 | 0.05528003  |
| TC1100011107.hg.1   | WDR74           | 0.307175  | 0.043671166 |
| TC0100008080.hg.1   | DPH2            | 0.306545  | 0.068658978 |
| TC0600006926.hg.1   | PAK1IP1         | 0.306205  | 0.046873561 |
| TC0600012671.hg.1   | ASCC3           | 0.306155  | 0.091684275 |
| TC1700011208.hg.1   | TRIM25; MIR3614 | 0.30583   | 0.0512073   |
| TC0700010925.hg.1   | DDX56           | 0.305645  | 0.051509395 |
| TC1200010281.hg.1   | FAM60A          | 0.305075  | 0.065232968 |
| TC0800007978.hg.1   | LY96            | 0.30422   | 0.073798434 |
| TC0300006687.hg.1   | CCDC174         | 0.3041725 | 0.072373494 |
| TC0600012628.hg.1   | NDUFAF4         | 0.303865  | 0.073798434 |
| TC0100014918.hg.1   | SETSIP          | 0.3033075 | 0.035493258 |
| TC1700008945.hg.1   | SPHK1           | 0.3031675 | 0.092004163 |
| TC0700012602.hg.1   | CEP41           | 0.301575  | 0.069665424 |
| TC1600008979.hg.1   | NARFL           | 0.30094   | 0.099349948 |
| TC1200011591.hg.1   | NTN4            | 0.3006925 | 0.072373494 |
| TC0100009580.hg.1   | WDR3            | 0.29949   | 0.082427867 |
| TC1300009712.hg.1   | EFNB2           | 0.299005  | 0.068777704 |
| TC0400012854.hg.1   | TMEM144         | 0.298065  | 0.05495911  |
| Unmapped00000078.hg | SLC16A1         | 0.29761   | 0.051988173 |
| TC0700010692.hg.1   | NT5C3A          | 0.2975575 | 0.083270988 |
| TC0600007447.hg.1   | OR2J3           | 0.297205  | 0.085583092 |
| TC1700007444.hg.1   | NSRP1; MIR423   | 0.29711   | 0.095424527 |
| TC0700009980.hg.1   | PRKAR1B         | 0.2969375 | 0.0512073   |
| TC1900007763.hg.1   | GPATCH1         | 0.296825  | 0.092004163 |
| TC0400012670.hg.1   | FAT1            | 0.296725  | 0.063760834 |
| TC0100011382.hg.1   | DYRK3           | 0.29517   | 0.073500874 |
| TC0600007250.hg.1   | SLC17A4         | 0.2943825 | 0.094919693 |
| TC2100006442.hg.1   | SIK1            | 0.2939975 | 0.070219298 |
| TC0300008964.hg.1   | MRPS22          | 0.29271   | 0.074271886 |



|                   |                     |           |             |
|-------------------|---------------------|-----------|-------------|
| TC2100008384.hg.1 | UBE2G2              | 0.2927025 | 0.078066478 |
| TC1000007889.hg.1 | SUPV3L1             | 0.291935  | 0.090665143 |
| TC1700011233.hg.1 | MRPS23              | 0.291205  | 0.076769831 |
| TC1900009766.hg.1 | TRMT1               | 0.2907575 | 0.055553424 |
| TC0300010769.hg.1 | GORASP1             | 0.290015  | 0.068605755 |
| TC1900008993.hg.1 | ZNF304              | 0.2895375 | 0.071844857 |
| TC1200008703.hg.1 | C12orf45            | 0.2893125 | 0.071969365 |
| TC0400008318.hg.1 | TET2                | 0.28913   | 0.0512073   |
| TC0900011840.hg.1 | MED22               | 0.28898   | 0.09888254  |
| TC1100011101.hg.1 | NXF1                | 0.2889025 | 0.050951887 |
| TC0800012405.hg.1 | FUT10               | 0.2887425 | 0.065753633 |
| TC1000012491.hg.1 | ENTPD7              | 0.288285  | 0.059599562 |
| TC0300006627.hg.1 | TSEN2               | 0.2877675 | 0.041776133 |
| TC0700009834.hg.1 | OC389602; AC021218. | 0.2875725 | 0.098341085 |
| TC0700008073.hg.1 | POR; MIR4651        | 0.28706   | 0.092203455 |
| TC1400009690.hg.1 | ABCD4               | 0.2869275 | 0.087590101 |
| TC1000008713.hg.1 | NOLC1               | 0.286265  | 0.089329888 |
| TC1700012217.hg.1 | TMEM199; MIR4723    | 0.2857375 | 0.059776557 |
| TC1200012003.hg.1 | RBM19               | 0.2856975 | 0.066567516 |
| TC0X00009537.hg.1 | ZNF674              | 0.285645  | 0.072373494 |
| TC1000012582.hg.1 | RRP12               | 0.28469   | 0.059928963 |
| TC0300013471.hg.1 | BCL6                | 0.2840525 | 0.0512073   |
| TC0700012122.hg.1 | DNAJC2              | 0.2835275 | 0.076769831 |
| TC0400011130.hg.1 | PAQR3               | 0.28318   | 0.045606855 |
| TC0500009059.hg.1 | GRPEL2              | 0.282675  | 0.051196291 |
| TC0800009301.hg.1 | C8orf33             | 0.2826475 | 0.067091848 |
| TC1200012804.hg.1 | PRIM1               | 0.2817075 | 0.094919693 |
| TC0700009488.hg.1 | CASP2               | 0.2806175 | 0.065232968 |
| TC1100011192.hg.1 | ATG2A               | 0.280355  | 0.076769831 |
| TC0700012760.hg.1 | ZC3HAV1L            | 0.279945  | 0.099093194 |
| TC1600010599.hg.1 | NAE1                | 0.27984   | 0.074271886 |
| TC2000010006.hg.1 | EIF6                | 0.279675  | 0.0512073   |
| TC0600014318.hg.1 | FAM46A              | 0.2795525 | 0.072373494 |
| TC0100014988.hg.1 | F3                  | 0.2791525 | 0.090253157 |
| TC0200011726.hg.1 | NOL10               | 0.2791425 | 0.078710038 |
| TC0700006913.hg.1 | GPNMB               | 0.2786725 | 0.051196291 |
| TC1000008423.hg.1 | RPP30               | 0.27813   | 0.069207837 |
| TC2100008297.hg.1 | SIK1                | 0.2777725 | 0.095111596 |
| TC0700013119.hg.1 | XRCC2               | 0.27744   | 0.081621662 |
| TC1000010818.hg.1 | CTNNA3              | 0.277345  | 0.099626159 |
| TC0200016507.hg.1 | LIMS3L; LIMS3       | 0.2772725 | 0.087590101 |
| TC0900007488.hg.1 | PIP5K1B             | 0.27722   | 0.094919693 |
| TC1700007585.hg.1 | SLFN5               | 0.2768375 | 0.092004163 |
| TC0100018567.hg.1 | RBM34               | 0.2754025 | 0.067443164 |
| TC1600010450.hg.1 | CIAPIN1             | 0.275335  | 0.065232968 |
| TC0600009142.hg.1 | RPF2                | 0.274875  | 0.083674222 |
| TC0300009625.hg.1 | TTC14               | 0.274705  | 0.100493558 |
| TC1600009420.hg.1 | RSL1D1              | 0.2742475 | 0.062798851 |
| TC1100013165.hg.1 | SLC43A3             | 0.273295  | 0.056626913 |
| TC0300010388.hg.1 | MRPS25              | 0.273175  | 0.095026515 |

|                     |                 |           |             |
|---------------------|-----------------|-----------|-------------|
| TC0100011619.hg.1   | RRP15           | 0.27291   | 0.092376425 |
| Unmapped00000486.hg | MLXIP           | 0.2718125 | 0.092429672 |
| TC0900007816.hg.1   | CTSL            | 0.2716325 | 0.069975781 |
| TC1700010798.hg.1   | DUSP3           | 0.27146   | 0.097429958 |
| TC0100015817.hg.1   | THEM4           | 0.271335  | 0.059928963 |
| TC0X00007195.hg.1   | RBM3            | 0.2711225 | 0.069339163 |
| TC0500008919.hg.1   | RNF14           | 0.2707525 | 0.092376425 |
| TC0200016603.hg.1   | LRRFIP1         | 0.2699775 | 0.099272227 |
| TC0300007259.hg.1   | CCRL2           | 0.269125  | 0.092203455 |
| TC0600013361.hg.1   | CITED2          | 0.2669125 | 0.068605755 |
| TC0X00009952.hg.1   | AWAT2           | 0.2664275 | 0.097429958 |
| TC0200007195.hg.1   | TTC27; MIR4765  | 0.2656725 | 0.094919693 |
| TC0600007711.hg.1   | ITPR3           | 0.2646325 | 0.078490128 |
| TC0300009694.hg.1   | ABCF3           | 0.2634875 | 0.085204682 |
| TC0800009872.hg.1   | TNFRSF10D       | 0.2631575 | 0.076298922 |
| TC0500007457.hg.1   | SETD9           | 0.26262   | 0.07498156  |
| TC0800007245.hg.1   | MAK16           | 0.262355  | 0.094919693 |
| TC0200015976.hg.1   | SP110           | 0.2616125 | 0.094919693 |
| TC0700010182.hg.1   | PMS2            | 0.2611125 | 0.069207837 |
| TC0300012315.hg.1   | TPRA1           | 0.2609575 | 0.087384918 |
| Unmapped00000461.hg | ZNF35           | 0.25698   | 0.092203455 |
| TC1200011301.hg.1   | KRR1            | 0.2569075 | 0.085962898 |
| TC1300006965.hg.1   | WBP4            | 0.2560575 | 0.098341085 |
| TC0300013829.hg.1   | RBM5            | 0.2552275 | 0.084868225 |
| TC1200008370.hg.1   | C12orf29        | 0.25504   | 0.100076993 |
| TC0500012163.hg.1   | CDC23           | 0.2545025 | 0.092004163 |
| TC0800006933.hg.1   | ATP6V1B2        | 0.254305  | 0.095208762 |
| TC0200012066.hg.1   | SLC5A6          | 0.25411   | 0.094919693 |
| TC0100010284.hg.1   | PEA15           | 0.2537875 | 0.08784533  |
| TC0700010435.hg.1   | CDCA7L          | 0.2534225 | 0.067091848 |
| TC2000010022.hg.1   | ZNFX1           | 0.25298   | 0.099876826 |
| TC1200012591.hg.1   | EMG1            | 0.2527    | 0.092203455 |
| TC0700007334.hg.1   | MRPL32          | 0.25226   | 0.062084018 |
| TC0800011372.hg.1   | SLC25A32        | 0.2520175 | 0.082427867 |
| TC1200008116.hg.1   | MDM2            | 0.2507125 | 0.071969365 |
| TC0100010102.hg.1   | FLAD1           | 0.250395  | 0.077218737 |
| TC0200010567.hg.1   | EEF1B2; SNORA41 | 0.24958   | 0.069665424 |
| TC0500007088.hg.1   | TARS            | 0.247895  | 0.067443164 |
| TC1600010752.hg.1   | AARS            | 0.2468475 | 0.087398953 |
| TC1100008797.hg.1   | PANX1           | 0.2453825 | 0.069665424 |
| TC1900011650.hg.1   | ARHGEF18        | 0.24258   | 0.090253157 |
| TC1700010501.hg.1   | DDX52           | 0.2394525 | 0.09268633  |
| TC0100010514.hg.1   | MPZL1           | 0.23945   | 0.087590101 |
| TC0200014597.hg.1   | RND3            | 0.2389875 | 0.087810386 |
| TC1700009451.hg.1   | CLUH            | 0.23882   | 0.080460097 |
| TC1700006466.hg.1   | RNMTL1          | 0.2387075 | 0.092004163 |
| TC1000007462.hg.1   | ZNF22           | 0.2377275 | 0.099876826 |
| TC1300008533.hg.1   | HSPH1           | 0.236215  | 0.098341085 |
| TC0500008864.hg.1   | WDR55           | 0.2357375 | 0.095873626 |
| TC1200008683.hg.1   | CHST11          | 0.234745  | 0.071622008 |

|                   |                       |            |             |
|-------------------|-----------------------|------------|-------------|
| TC1400009576.hg.1 | 2BP-COX16; COX16; SYN | 0.2342575  | 0.091684275 |
| TC1400008684.hg.1 | PRMT5                 | 0.2339925  | 0.092203455 |
| TC0600013757.hg.1 | SOD2                  | 0.2330175  | 0.067443164 |
| TC2100006852.hg.1 | USP16                 | 0.2321425  | 0.092776123 |
| TC1700008498.hg.1 | PPM1D                 | 0.230865   | 0.09268633  |
| TC0200011171.hg.1 | SH3BP4                | 0.22828    | 0.095766335 |
| TC0200015349.hg.1 | HSPD1                 | 0.2269825  | 0.072547477 |
| TC1900008924.hg.1 | U2AF2                 | 0.2264975  | 0.08475445  |
| TC0900012168.hg.1 | MRRF                  | 0.2250775  | 0.085583092 |
| TC0300012728.hg.1 | PLSCR1                | 0.22463    | 0.100076993 |
| TC1200012161.hg.1 | TRIAP1                | 0.2242425  | 0.094919693 |
| TC1700009189.hg.1 | HGS                   | 0.2228025  | 0.092429672 |
| TC0100015715.hg.1 | SF3B4                 | 0.2217625  | 0.092203455 |
| TC2000007283.hg.1 | SRC                   | 0.21928    | 0.081470333 |
| TC1600006995.hg.1 | BFAR                  | 0.2133925  | 0.100060779 |
| TC1100011035.hg.1 | CPSF7                 | 0.2133475  | 0.100060779 |
| TC1700012262.hg.1 | PSME3                 | 0.2132275  | 0.092203455 |
| TC0900008484.hg.1 | PRPF4                 | 0.21252    | 0.090665143 |
| TC0100018435.hg.1 | EBNA1BP2; MIR6733     | 0.21012    | 0.092203455 |
| TC0600014276.hg.1 | HLA-DMB               | -0.225435  | 0.094396878 |
| TC0500009622.hg.1 | GRK6                  | -0.22718   | 0.092203455 |
| TC1600006610.hg.1 | CCNF                  | -0.2283825 | 0.094919693 |
| TC0300013598.hg.1 | LRRC15                | -0.228915  | 0.092203455 |
| TC0700010321.hg.1 | ETV1                  | -0.229145  | 0.076298922 |
| TC1100013022.hg.1 | FADS2                 | -0.232355  | 0.070219298 |
| TC1100012976.hg.1 | NUCB2                 | -0.23361   | 0.092638529 |
| TC0300011173.hg.1 | NT5DC2                | -0.23388   | 0.087896495 |
| TC0300012145.hg.1 | FSTL1; MIR198         | -0.2367625 | 0.08244143  |
| TC0X00007170.hg.1 | SPACA5B               | -0.2404175 | 0.092203455 |
| TC0900011631.hg.1 | GOLGA2                | -0.240485  | 0.094945237 |
| TC1100011514.hg.1 | DHCR7                 | -0.241065  | 0.081957036 |
| TC1300008511.hg.1 | KATNAL1               | -0.2434875 | 0.094919693 |
| TC0800010002.hg.1 | DUSP4                 | -0.24427   | 0.092203455 |
| TC0600009459.hg.1 | ENPP1                 | -0.24806   | 0.065232968 |
| TC2000006464.hg.1 | FAM110A               | -0.2484975 | 0.095424527 |
| TC1500009522.hg.1 | MNS1                  | -0.250135  | 0.066567516 |
| TC1600008498.hg.1 | VAT1L                 | -0.251785  | 0.06739708  |
| TC1500006951.hg.1 | KNSTRN                | -0.25252   | 0.072628767 |
| TC0600007301.hg.1 | BTN3A2                | -0.2527425 | 0.080119392 |
| TC0600007700.hg.1 | KIFC1                 | -0.2537025 | 0.076707853 |
| TC0X00009044.hg.1 | GPR143                | -0.2543075 | 0.095111596 |
| TC2000009058.hg.1 | TGM2                  | -0.254875  | 0.056626913 |
| TC1200012833.hg.1 | PAH                   | -0.255685  | 0.092004163 |
| TC0900009437.hg.1 | AK3                   | -0.2564025 | 0.056814452 |
| TC2200006675.hg.1 | SERPIND1              | -0.257235  | 0.092203455 |
| TC0400011144.hg.1 | ANTXR2                | -0.258135  | 0.086655659 |
| TC0900012154.hg.1 | TMEFF1                | -0.25828   | 0.100076993 |
| TC0700007198.hg.1 | ANLN                  | -0.25845   | 0.062084018 |
| TC1500010018.hg.1 | SEMA7A                | -0.2591775 | 0.062653524 |
| TC1700007042.hg.1 | MPRIIP                | -0.25968   | 0.094005923 |

|                   |           |            |             |
|-------------------|-----------|------------|-------------|
| TC1200009621.hg.1 | FOXM1     | -0.260985  | 0.065232968 |
| TC0700012968.hg.1 | PDIA4     | -0.2610425 | 0.076707853 |
| TC1900006711.hg.1 | TNFAIP8L1 | -0.262     | 0.080119392 |
| TC0600013280.hg.1 | MAP3K5    | -0.2631325 | 0.099876826 |
| TC1100012516.hg.1 | CCDC153   | -0.2633925 | 0.065232968 |
| TC0100016633.hg.1 | RGS8      | -0.266145  | 0.072517654 |
| TC1500007695.hg.1 | PAQR5     | -0.2669275 | 0.050116522 |
| TC1900009651.hg.1 | YIPF2     | -0.267085  | 0.072373494 |
| TC2000009550.hg.1 | AURKA     | -0.26712   | 0.0512073   |
| TC0100010381.hg.1 | UAP1      | -0.2716925 | 0.062761    |
| TC1500007185.hg.1 | FGF7      | -0.2718325 | 0.072373494 |
| TC1500007967.hg.1 | DNAJA4    | -0.27249   | 0.083270988 |
| TC0100009067.hg.1 | FNBP1L    | -0.27303   | 0.085996293 |
| TC1900011270.hg.1 | HAS1      | -0.273315  | 0.092376425 |
| TC0100017066.hg.1 | KLHDC8A   | -0.2737425 | 0.087810386 |
| TC0900008740.hg.1 | OLFML2A   | -0.274275  | 0.092203455 |
| TC1200009136.hg.1 | CABP1     | -0.277285  | 0.091138941 |
| TC0800006760.hg.1 | FDFT1     | -0.2775625 | 0.060248261 |
| TC1000007748.hg.1 | CDK1      | -0.2777825 | 0.062084018 |
| TC1200008873.hg.1 | SH2B3     | -0.2786375 | 0.076298922 |
| TC0700007054.hg.1 | PRR15     | -0.2792225 | 0.072373494 |
| TC0100010389.hg.1 | HSD17B7   | -0.2802025 | 0.081627833 |
| TC1100010456.hg.1 | PAX6      | -0.2802875 | 0.09268633  |
| TC0900008969.hg.1 | ABL1      | -0.28065   | 0.094406062 |
| TC1000009536.hg.1 | IDI1      | -0.2806525 | 0.0512073   |
| TC0200012452.hg.1 | SIX2      | -0.2808875 | 0.094005923 |
| TC1200009759.hg.1 | CDCA3     | -0.2828825 | 0.067443164 |
| TC0600011945.hg.1 | RCAN2     | -0.2831625 | 0.092203455 |
| TC1000008891.hg.1 | DUSP5     | -0.283575  | 0.081494626 |
| TC1000007883.hg.1 | SRGN      | -0.2836075 | 0.043671166 |
| TC2200007662.hg.1 | GTSE1     | -0.28417   | 0.053535836 |
| TC0400012102.hg.1 | LRBA      | -0.28493   | 0.060248261 |
| TC0800010275.hg.1 | PLAT      | -0.285825  | 0.064787215 |
| TC1200007147.hg.1 | ARNTL2    | -0.2862875 | 0.062084018 |
| TC0X00009386.hg.1 | SRPX      | -0.2866075 | 0.043671166 |
| TC1700010790.hg.1 | ETV4      | -0.286675  | 0.08475445  |
| TC0500013244.hg.1 | PCDHB16   | -0.2867675 | 0.0512073   |
| TC0300014063.hg.1 | ANKUB1    | -0.28811   | 0.070219298 |
| TC0700008358.hg.1 | COL1A2    | -0.2882375 | 0.069665424 |
| TC1400010261.hg.1 | MOK       | -0.2887125 | 0.09429802  |
| TC0900009127.hg.1 | COL5A1    | -0.289425  | 0.072373494 |
| TC0500007804.hg.1 | HMGCR     | -0.29009   | 0.072791484 |
| TC0X00007267.hg.1 | MAGED1    | -0.2904825 | 0.095424527 |
| TC0600013186.hg.1 | CTGF      | -0.29255   | 0.092203455 |
| TC0900008675.hg.1 | OR1L6     | -0.292765  | 0.083456849 |
| TC0500008620.hg.1 | CSF2      | -0.29339   | 0.092203455 |
| TC1500010715.hg.1 | BUB1B     | -0.29367   | 0.062084018 |
| TC0400012645.hg.1 | SORBS2    | -0.2969425 | 0.100388467 |
| TC1600010561.hg.1 | CDH11     | -0.29745   | 0.066567516 |
| TC1000009276.hg.1 | DOCK1     | -0.2979775 | 0.078160506 |

|                   |                |            |             |
|-------------------|----------------|------------|-------------|
| TC1600011508.hg.1 | CDR2           | -0.29877   | 0.085368395 |
| TC0X00010670.hg.1 | TMEM255A       | -0.298825  | 0.074271886 |
| TC2000008614.hg.1 | NKX2-2         | -0.299145  | 0.094919693 |
| TC0600007511.hg.1 | TRIM40         | -0.29974   | 0.09268633  |
| TC1700009476.hg.1 | OR3A1          | -0.2997425 | 0.095424527 |
| TC0100008057.hg.1 | CDC20          | -0.3004925 | 0.0512073   |
| TC0X00007191.hg.1 | EBP            | -0.300525  | 0.035844342 |
| TC1700010618.hg.1 | TOP2A          | -0.3007225 | 0.046873561 |
| TC0300013599.hg.1 | GP5            | -0.3014725 | 0.087590101 |
| TC0400011015.hg.1 | CXCL3          | -0.3015475 | 0.0512073   |
| TC0100011022.hg.1 | RGS2           | -0.301605  | 0.09429802  |
| TC0400009221.hg.1 | MSMO1          | -0.303265  | 0.061960415 |
| TC0100008101.hg.1 | KIF2C          | -0.3032925 | 0.085204682 |
| TC0100013169.hg.1 | PLA2G2C        | -0.3034975 | 0.096017879 |
| TC1900011770.hg.1 | C5AR1          | -0.304505  | 0.072373494 |
| TC1200007640.hg.1 | SLC4A8         | -0.3047225 | 0.080119392 |
| TC0900006527.hg.1 | CDC37L1        | -0.30503   | 0.092203455 |
| TC0400012432.hg.1 | HMGB2          | -0.305405  | 0.072464434 |
| TC0600009381.hg.1 | CENPW          | -0.3061625 | 0.065232968 |
| TC0500008880.hg.1 | PCDHB7         | -0.3070175 | 0.099876826 |
| TC1200010415.hg.1 | SLC2A13        | -0.3077775 | 0.092004163 |
| TC0X00008724.hg.1 | HMGB3          | -0.3084425 | 0.084675912 |
| TC2000007855.hg.1 | SPO11          | -0.309055  | 0.0512073   |
| TC0100012544.hg.1 | MMEL1          | -0.30956   | 0.098341085 |
| TC1300008289.hg.1 | ZDHHC20        | -0.310165  | 0.075486276 |
| TC1700008938.hg.1 | UBALD2         | -0.31048   | 0.0512073   |
| TC0400011018.hg.1 | CXCL2          | -0.31101   | 0.060475341 |
| TC1600007235.hg.1 | PLK1           | -0.312165  | 0.035844342 |
| TC0100016163.hg.1 | ADAMTS4        | -0.3123025 | 0.0512073   |
| TC0900007848.hg.1 | NXNL2          | -0.31382   | 0.087398953 |
| TC2000009970.hg.1 | SIRPB1         | -0.3141075 | 0.0512073   |
| TC0100016406.hg.1 | VAMP4          | -0.3146525 | 0.051196291 |
| TC1600009689.hg.1 | PDZD9          | -0.3147775 | 0.052350227 |
| TC0200016099.hg.1 | HJURP          | -0.31479   | 0.0512073   |
| TC0400011748.hg.1 | CCNA2          | -0.31505   | 0.071470684 |
| TC2200007544.hg.1 | BIK            | -0.31601   | 0.067904095 |
| TC0300008324.hg.1 | PHLDB2; PLCXD2 | -0.316175  | 0.093578588 |
| TC0900012155.hg.1 | MSANTD3-TMEFF1 | -0.3162    | 0.06837185  |
| TC0900006538.hg.1 | JAK2           | -0.3182325 | 0.059587735 |
| TC1700008690.hg.1 | PITPNC1        | -0.31878   | 0.090975338 |
| TC1400007443.hg.1 | HSPA2          | -0.319555  | 0.068605755 |
| TC0X00010484.hg.1 | COL4A6         | -0.31956   | 0.03470232  |
| TC2200006540.hg.1 | USP18          | -0.31957   | 0.094396878 |
| TC0900008628.hg.1 | CNTRL          | -0.319635  | 0.057313125 |
| TC1900011693.hg.1 | ZNF429         | -0.3210225 | 0.076769831 |
| TC0100007102.hg.1 | PADI1          | -0.3213    | 0.093282551 |
| TC1400009184.hg.1 | TXNDC16        | -0.321725  | 0.0512073   |
| TC1900008561.hg.1 | AKT1S1         | -0.321745  | 0.0512073   |
| TC0300008130.hg.1 | COL8A1         | -0.32194   | 0.081470333 |
| TC0X00008747.hg.1 | GABRQ          | -0.322285  | 0.0512073   |

|                   |                      |            |             |
|-------------------|----------------------|------------|-------------|
| TC0700013224.hg.1 | LMBR1                | -0.3225425 | 0.094005923 |
| TC0600007820.hg.1 | CLPSL1               | -0.32304   | 0.07498156  |
| TC0300011172.hg.1 | TNNC1                | -0.3234675 | 0.099093194 |
| TC0100018226.hg.1 | RP5-1198O20.4; KLF17 | -0.323965  | 0.099876826 |
| TC0500013215.hg.1 | LVRN                 | -0.32492   | 0.092203455 |
| TC1400009329.hg.1 | RTN1                 | -0.326135  | 0.095424527 |
| TC1200012802.hg.1 | PAN2; CNPY2          | -0.3267475 | 0.087590101 |
| TC0400012452.hg.1 | FBXO8                | -0.327055  | 0.059776557 |
| TC0600009080.hg.1 | CEP57L1              | -0.3287375 | 0.092429672 |
| TC0300012236.hg.1 | MUC13                | -0.3289875 | 0.072544283 |
| TC1500006999.hg.1 | NUSAP1               | -0.33029   | 0.04611798  |
| TC0300009795.hg.1 | RTP1                 | -0.33171   | 0.095026515 |
| TC2200007356.hg.1 | KDELR3               | -0.3317375 | 0.0512073   |
| TC0300009136.hg.1 | TM4SF1-AS1           | -0.331775  | 0.096891836 |
| TC0200015776.hg.1 | RESP18               | -0.33286   | 0.083456849 |
| TC0X00008232.hg.1 | ZCCHC12              | -0.334035  | 0.085204682 |
| TC1600011494.hg.1 | ARL6IP1              | -0.33503   | 0.025547592 |
| TC0500009648.hg.1 | N4BP3                | -0.335065  | 0.072373494 |
| TC0400009088.hg.1 | GUCY1B3              | -0.335105  | 0.033273608 |
| TC1000008471.hg.1 | KIF11                | -0.337815  | 0.067091848 |
| TC0100013369.hg.1 | STMN1; MIR3917       | -0.3397675 | 0.025111113 |
| TC1200010050.hg.1 | LMO3                 | -0.34021   | 0.031751474 |
| TC1000009714.hg.1 | PRKCQ                | -0.341215  | 0.099626159 |
| TC0900009561.hg.1 | LINC01235            | -0.3417175 | 0.043835359 |
| TC0100007584.hg.1 | PTPRU                | -0.3433925 | 0.03483561  |
| TC1500007699.hg.1 | KIF23                | -0.343505  | 0.033225252 |
| TC0300008853.hg.1 | TMEM108              | -0.343995  | 0.092776123 |
| TC0600011448.hg.1 | LY6G6C               | -0.346825  | 0.076298922 |
| TC1700012285.hg.1 | PRR11                | -0.347455  | 0.045370227 |
| TC0300012924.hg.1 | VEPH1                | -0.3487325 | 0.035844342 |
| TC0300007221.hg.1 | ZNF501               | -0.3490375 | 0.095873626 |
| TC0100011064.hg.1 | CFH                  | -0.34994   | 0.075667099 |
| TC0100016891.hg.1 | KIF14                | -0.3519375 | 0.067361676 |
| TC1900011470.hg.1 | UBE2S                | -0.352095  | 0.0512073   |
| TC1000012474.hg.1 | NUTM2D               | -0.35332   | 0.091429365 |
| TC1900008384.hg.1 | CALM3                | -0.3537425 | 0.029506117 |
| TC0200015204.hg.1 | COL5A2               | -0.3541775 | 0.028062459 |
| TC0600014215.hg.1 | GMDS                 | -0.35478   | 0.097654003 |
| TC0800007665.hg.1 | RP1                  | -0.3555125 | 0.043835359 |
| TC1600007014.hg.1 | NDE1; MIR484         | -0.356095  | 0.021851241 |
| TC1200007906.hg.1 | XRCC6BP1             | -0.35802   | 0.056350538 |
| TC1600008986.hg.1 | GNG13                | -0.359775  | 0.062989335 |
| TC0200012248.hg.1 | FEZ2                 | -0.3600025 | 0.069665424 |
| TC0900006522.hg.1 | SLC1A1               | -0.3603975 | 0.053192954 |
| TC2000009996.hg.1 | DUSP15               | -0.3609825 | 0.064308903 |
| TC1200007764.hg.1 | ZNF385A              | -0.3613875 | 0.037818217 |
| TC0100007638.hg.1 | SERINC2              | -0.3620325 | 0.04974955  |
| TC0800009094.hg.1 | DENND3               | -0.3629425 | 0.084587398 |
| TC1000008482.hg.1 | CEP55                | -0.363885  | 0.087810386 |
| TC0900009043.hg.1 | GFI1B                | -0.36441   | 0.073665224 |

|                      |                |            |             |
|----------------------|----------------|------------|-------------|
| TC0300006791.hg.1    | KAT2B          | -0.36519   | 0.085970286 |
| TC0700007984.hg.1    | VPS37D         | -0.365525  | 0.092203455 |
| TC2200008036.hg.1    | USP41          | -0.366015  | 0.085583092 |
| TC2100006784.hg.1    | JAM2           | -0.3662425 | 0.027089429 |
| TC1500010422.hg.1    | IDH2           | -0.366955  | 0.027911185 |
| TC0100007117.hg.1    | ARHGEF10L      | -0.3673125 | 0.0512073   |
| TC1500010463.hg.1    | PRC1           | -0.36886   | 0.053535836 |
| TC0900007064.hg.1    | DNAJB5         | -0.36981   | 0.034332503 |
| TC2000006688.hg.1    | SNAP25         | -0.3702    | 0.043835359 |
| TC1100010418.hg.1    | KIF18A         | -0.37055   | 0.033225252 |
| TC0200009470.hg.1    | HNMT           | -0.3705625 | 0.025111113 |
| TC0300012572.hg.1    | CEP70          | -0.37072   | 0.100493558 |
| TC0100009307.hg.1    | NTNG1          | -0.372825  | 0.074271886 |
| TC0800007389.hg.1    | C8orf4         | -0.3765325 | 0.067091848 |
| TC0500012166.hg.1    | CDC25C         | -0.3765775 | 0.050357317 |
| TC0100009324.hg.1    | FAM102B        | -0.3767975 | 0.035844342 |
| TC2200006432.hg.1    | BAGE5          | -0.3771775 | 0.072373494 |
| TC0200015951.hg.1    | PID1           | -0.3781625 | 0.030562683 |
| TC1000008968.hg.1    | ADRB1          | -0.3794375 | 0.041665902 |
| TC0X00009988.hg.1    | ZMYM3          | -0.3796    | 0.028797223 |
| TC1900011103.hg.1    | TULP2          | -0.3796325 | 0.08475445  |
| TC0X00010990.hg.1    | SPANXC; SPANXD | -0.3819725 | 0.092203455 |
| TC0X00006585.hg.1    | SHROOM2        | -0.3827325 | 0.0512073   |
| TC0700013338.hg.1    | GLCCI1         | -0.3833825 | 0.069665424 |
| TC0900009825.hg.1    | DDX58          | -0.3847625 | 0.079872125 |
| TC1000008054.hg.1    | PLAU           | -0.3847675 | 0.01247524  |
| TC0800012387.hg.1    | DLC1           | -0.3863775 | 0.062798851 |
| TC0100017172.hg.1    | IRF6           | -0.3876825 | 0.095873626 |
| TC0300009122.hg.1    | CPA3           | -0.3877775 | 0.098341085 |
| TC1900009637.hg.1    | CDKN2D         | -0.388345  | 0.053535836 |
| TC1200012143.hg.1    | CIT; MIR1178   | -0.3904475 | 0.043671166 |
| TC0300012943.hg.1    | LXN            | -0.393295  | 0.076525154 |
| TC1100010535.hg.1    | PAMR1          | -0.3955    | 0.028797223 |
| TC2200008845.hg.1    | SHISA8         | -0.3964975 | 0.072628767 |
| ¿Unmapped00000475.hg | PADI4          | -0.3971975 | 0.046330913 |
| TC1700012370.hg.1    | TBC1D28        | -0.3974025 | 0.0512073   |
| TC0100014543.hg.1    | DEPDC1         | -0.398625  | 0.015650572 |
| TC2000007341.hg.1    | FAM83D         | -0.4002525 | 0.015620196 |
| TC0700010437.hg.1    | RAPGEF5        | -0.4010475 | 0.092203455 |
| TC0700011066.hg.1    | COBL           | -0.4024625 | 0.066567516 |
| TC1500007829.hg.1    | LOXL1          | -0.4047625 | 0.046873561 |
| ¿Unmapped00000815.hg | RPS6KA1        | -0.4104525 | 0.08475445  |
| TC1900010802.hg.1    | LIPE           | -0.4109775 | 0.037818217 |
| TC1600011362.hg.1    | ACSM3          | -0.41193   | 0.051196291 |
| TC0500009097.hg.1    | SYNPO          | -0.412705  | 0.021865032 |
| TC0800009465.hg.1    | SPAG11B        | -0.4131325 | 0.0512073   |
| TC0100015509.hg.1    | FAM72B         | -0.4166    | 0.013312527 |
| TC0100017094.hg.1    | FAM72A         | -0.416675  | 0.015497907 |
| TC1100011285.hg.1    | B4GAT1         | -0.4178    | 0.019900199 |
| TC1300008080.hg.1    | TUBGCP3        | -0.4182475 | 0.0512073   |

|                     |                       |            |             |
|---------------------|-----------------------|------------|-------------|
| TC2000007015.hg.1   | PYGB                  | -0.4185125 | 0.043671166 |
| TC1200008650.hg.1   | ASCL1                 | -0.4206325 | 0.056626913 |
| TC0400007840.hg.1   | CXCL1                 | -0.423435  | 0.019594536 |
| TC0300011941.hg.1   | MYH15                 | -0.4301125 | 0.065232968 |
| TC0100009333.hg.1   | GPSM2                 | -0.4321575 | 0.028797223 |
| TC0300009531.hg.1   | NLGN1                 | -0.43273   | 0.060248261 |
| TC0200016417.hg.1   | CENPA                 | -0.4337175 | 0.031580265 |
| TC1200006520.hg.1   | TSPAN9                | -0.43516   | 0.029506117 |
| TC1100010410.hg.1   | BDNF                  | -0.4357825 | 0.0512073   |
| TC0200012997.hg.1   | TGFA                  | -0.4358225 | 0.0114496   |
| TC1900009186.hg.1   | ATP8B3                | -0.4362475 | 0.019900199 |
| TC1000007910.hg.1   | COL13A1               | -0.4364275 | 0.043835359 |
| TC0200013008.hg.1   | CD207                 | -0.436575  | 0.046873561 |
| TC1400006540.hg.1   | RNASE2                | -0.436725  | 0.072373494 |
| TC0900011947.hg.1   | GLT6D1                | -0.437285  | 0.094452601 |
| TC0100017947.hg.1   | OPN3                  | -0.44114   | 0.0114496   |
| TC0600010057.hg.1   | ACAT2                 | -0.441545  | 0.013312527 |
| TC1400007566.hg.1   | SMOC1                 | -0.442285  | 0.015797933 |
| TC1600010532.hg.1   | CDH8                  | -0.445015  | 0.039202312 |
| TC1300009980.hg.1   | LMO7                  | -0.4454125 | 0.043835359 |
| TC1600010012.hg.1   | PYDC1                 | -0.446225  | 0.033167433 |
| TC1200008597.hg.1   | GAS2L3                | -0.44792   | 0.040005001 |
| TC1700012380.hg.1   | SPAG5                 | -0.449615  | 0.025547592 |
| TC1100008069.hg.1   | CNIH2                 | -0.450175  | 0.052143138 |
| TC0200015432.hg.1   | MPP4                  | -0.4515325 | 0.025547592 |
| TC0900012163.hg.1   | ORM2                  | -0.4516625 | 0.066567516 |
| TC0100009723.hg.1   | FAM72D                | -0.4517125 | 0.015797933 |
| TC0100007105.hg.1   | PADI4                 | -0.4521975 | 0.01900165  |
| TC1100013152.hg.1   | SAA2; SAA2-SAA4; SAA4 | -0.45341   | 0.043835359 |
| TC0700012453.hg.1   | SLC13A1               | -0.45342   | 0.099876826 |
| TC0600013190.hg.1   | MOXD1                 | -0.4538425 | 0.0114496   |
| TC0500009320.hg.1   | HMMR                  | -0.4540375 | 0.011058322 |
| TC0800012470.hg.1   | TMEM71                | -0.455225  | 0.031580265 |
| TC2000009357.hg.1   | PREX1                 | -0.4561825 | 0.0114496   |
| TC0700012439.hg.1   | AASS                  | -0.4564425 | 0.060248261 |
| Unmapped00000049.hg | PADI3                 | -0.4591725 | 0.028923376 |
| TC1100009433.hg.1   | HYLS1                 | -0.460225  | 0.024899557 |
| TC1500007392.hg.1   | CCNB2                 | -0.470105  | 0.025954412 |
| TC0100015550.hg.1   | FAM72C                | -0.4778625 | 0.009241112 |
| TC1000010870.hg.1   | SRGN                  | -0.4781925 | 0.059776557 |
| TC0100015192.hg.1   | PSRC1                 | -0.4793025 | 0.046498911 |
| TC0100007103.hg.1   | PADI3                 | -0.481445  | 0.034996871 |
| TC1300006734.hg.1   | MTUS2                 | -0.48247   | 0.0512073   |
| TC0100014528.hg.1   | DIRAS3                | -0.4829575 | 0.043835359 |
| TC1400009248.hg.1   | DLGAP5                | -0.4836775 | 0.008102    |
| TC0200014672.hg.1   | NR4A2                 | -0.4869225 | 0.072791484 |
| TC1700012458.hg.1   | CEP112                | -0.490425  | 0.094919693 |
| TC0X00007325.hg.1   | RIBC1                 | -0.4919725 | 0.023149911 |
| TC1200012853.hg.1   | NOS1                  | -0.496215  | 0.099093194 |
| TC1200012753.hg.1   | KLRC2                 | -0.496325  | 0.060691477 |



|                   |                 |            |             |
|-------------------|-----------------|------------|-------------|
| TC0800009428.hg.1 | XKR5            | -0.497885  | 0.035016894 |
| TC0100013028.hg.1 | EPHA2           | -0.5014625 | 0.011058322 |
| TC0200009539.hg.1 | ARHGAP15        | -0.5020075 | 0.087810386 |
| TC0100014995.hg.1 | CNN3            | -0.5027075 | 0.011058322 |
| TC0500007665.hg.1 | CCNB1           | -0.5057425 | 0.011058322 |
| TC0600007266.hg.1 | HIST1H1C        | -0.514315  | 0.038822528 |
| TC0100016831.hg.1 | ASPM            | -0.51919   | 0.018161365 |
| TC0200013913.hg.1 | IL1A            | -0.5222225 | 0.009877926 |
| TC1500009200.hg.1 | TTBK2           | -0.522465  | 0.0512073   |
| TC0700012276.hg.1 | DOCK4           | -0.522535  | 0.031930039 |
| TC1400007201.hg.1 | CDKN3           | -0.5248175 | 0.018847454 |
| TC0200015266.hg.1 | TMEFF2          | -0.5277475 | 0.024710658 |
| TC1500008983.hg.1 | SLC12A6         | -0.5281    | 0.027911185 |
| TC0500013309.hg.1 | ESM1            | -0.5346275 | 0.054474791 |
| TC1500007739.hg.1 | THSD4           | -0.5365425 | 0.070749101 |
| TC1000009155.hg.1 | DMBT1           | -0.5376925 | 0.008102    |
| TC0800012308.hg.1 | ADHFE1; C8orf46 | -0.539645  | 0.062852995 |
| TC0400006951.hg.1 | CD38            | -0.55091   | 0.100493558 |
| TC1400009175.hg.1 | NID2            | -0.5514475 | 0.009241112 |
| TC2000007083.hg.1 | ID1             | -0.5577525 | 0.015620196 |
| TC0100014585.hg.1 | NEGR1           | -0.5586825 | 0.018616939 |
| TC0200009739.hg.1 | GALNT5          | -0.5653375 | 0.017759987 |
| TC1700009730.hg.1 | RCVRN           | -0.570695  | 0.083270988 |
| TC0100016694.hg.1 | IVNS1ABP        | -0.57712   | 0.008102    |
| TC1500010184.hg.1 | BCL2A1          | -0.5806275 | 0.01257972  |
| TC0200013298.hg.1 | ST3GAL5         | -0.5837325 | 0.041776133 |
| TC0600007694.hg.1 | B3GALT4         | -0.5951175 | 0.005637494 |
| TC0500010635.hg.1 | HMGCS1          | -0.60603   | 0.008102    |
| TC1200012856.hg.1 | VSIG10          | -0.6209125 | 0.032071873 |
| TC0500008777.hg.1 | KIF20A          | -0.6344775 | 0.005200956 |
| TC0100017216.hg.1 | NEK2            | -0.6460625 | 0.009144768 |
| TC1800007340.hg.1 | DCC             | -0.6596625 | 0.034996871 |
| TC1000006782.hg.1 | ECHDC3          | -0.694735  | 0.033167433 |
| TC0800009782.hg.1 | CSGALNACT1      | -0.69647   | 0.009241112 |
| TC1900011467.hg.1 | IL11            | -0.7352325 | 0.008102    |
| TC0800012006.hg.1 | PTK2            | -0.75084   | 0.019900199 |
| TC1200007626.hg.1 | METTL7A         | -0.792345  | 0.0114496   |
| TC0200015350.hg.1 | RFTN2           | -1.16008   | 0.009877926 |
