# Supplementary material for: Involvement of Mitochondria in the Selective Response to Microsecond Pulsed Electric Fields on Healthy and Cancer Stem Cells in the Brain
Source: MDPI journal article supplement (doi:10.3390/ijms25042233), 2024-02-13
Supplement: s1 [file s1]

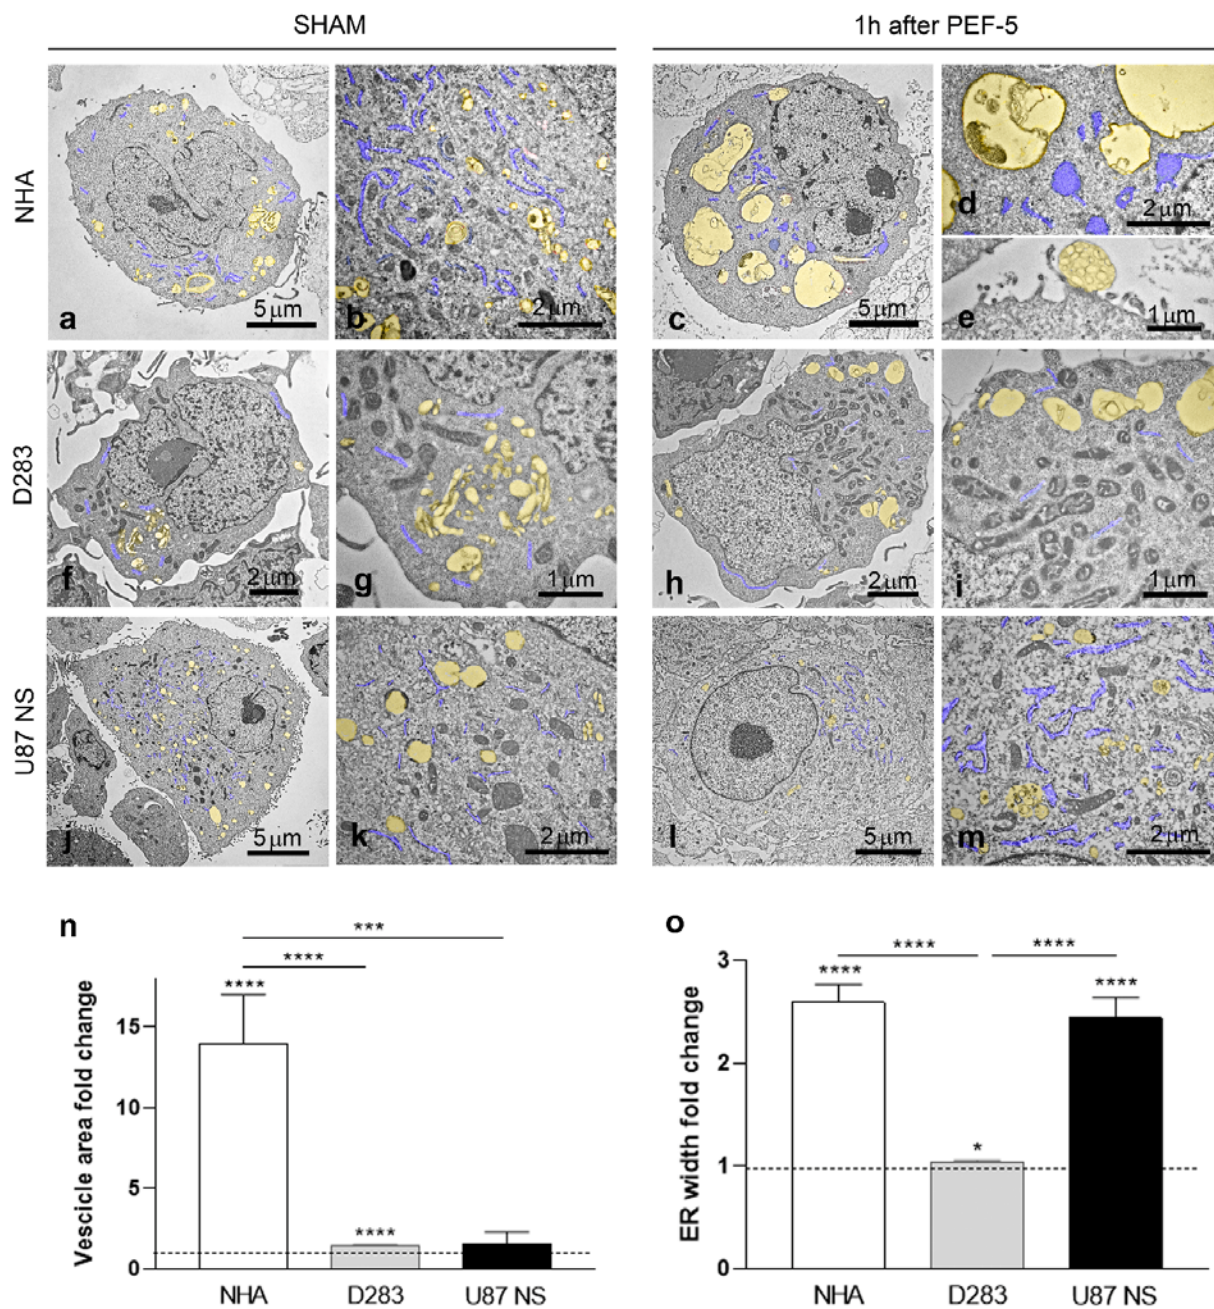

**Supplementary Figure S3.** Morphological analysis of MVBs formation and ER enlargement. (a-m) TEM images highlights in blue the RE and in yellow the MVBs in (a-b) SHAM-exposed NHA with respect to (c-d) PEF-5-exposed NHA, in (f-g) SHAM-exposed D283 cells with respect to (h-i) PEF-5-exposed D283 cells, in (j-k) SHAM-exposed U87 NS with respect to (l-m) PEF-5-exposed U87 NS. (e) multivesicular bodies are showed on the cell surface of PEF-5-exposed NHA. Graphs show (n) the vesicles area and (o) ER width evaluation expressed as fold increase of PEF-5-exposed cells with respect to relative SHAM (dotted lines).
